# Supplementary material for: Facile intra- and intermolecular charge transfer control for efficient mechanofluorochromic material
Source: Royal Society of Chemistry journal article supplement (doi:10.1039/d1ma00407g), 2021-01-01
Supplement: d1ma00407g1.pdf [file d1ma00407g1.pdf]

*Electronic Supplementary Information*

**Facile Intra- and Intermolecular Charge Transfer Control for Efficient  
Mechanofluorochromic Material**

Min-Ji Kim, Mina Ahn, and Kyung-Ryang Wee\*

Department of Chemistry and Institute of Natural Science, Daegu University, Gyeongsan  
38453, Republic of Korea.

## Table of Contents

|                                                                                                  |         |
|--------------------------------------------------------------------------------------------------|---------|
| Experimental Section                                                                             | S3      |
| Figure S1-S10. <sup>1</sup> H-NMR and <sup>13</sup> C{ <sup>1</sup> H}-NMR spectra of CN-OMe     | S5-S9   |
| Figure S11. GC-MS data                                                                           | S10-S11 |
| Figure S12-S14. ORTEP drawing of CN, F, and Me                                                   | S12     |
| Table S1-S3. Crystal data and structure refinement for CN, F, and Me                             | S13-S15 |
| Figure S15. CV curves of CN-OMe in CH <sub>2</sub> Cl <sub>2</sub>                               | S16     |
| Figure S16. Hammett plots                                                                        | S16     |
| Table S4. Energy band gap properties of CN-OMe                                                   | S17     |
| Figure S17. Absorption and emission spectra of TPA, Py, and all compounds in solution            | S17     |
| Table S5. Absorption and molar extinction coefficients                                           | S17     |
| Figure S18. Absorption and emission spectra of CN-OMe in the solid state                         | S18     |
| Figure S19. Emission spectra of CN-OMe in THF/H <sub>2</sub> O mixtures with different <i>fw</i> | S19     |
| Figure S20. Emission spectra in different solid-state: pristine, ground, and fumed powder        | S20     |
| Table S6. Emission peak/shoulders of CN-OMe in different solid-state                             | S20     |
| Figure S21. Reversible switching of emission by repeating grinding-acetone fuming cycles         | S21     |
| Figure S22. Absorption and emission spectra in PMMA film                                         | S21     |
| Figure S23. Comparison of emission spectra between solution and solid state                      | S22     |
| Figure S24. SC-XRD powder pattern and PXRD pattern                                               | S23-S24 |
| Figure S25. Absorption spectra in various solvents                                               | S25     |
| Figure S26. Emission spectra in various solvents                                                 | S26     |
| Table S7. Spectroscopic parameters in various solvents                                           | S27-S28 |
| Lippert-Mataga calculation                                                                       | S29     |
| Figure S27 Emission spectra and Lippert-Mataga plots of CN-OMe in various solvents               | S29     |
| Figure S28. Lippert-Mataga plots                                                                 | S30     |
| Table S8. Dipole moment value in the ground and excited states                                   | S31     |
| Figure S29. Fluorescence lifetimes in toluene                                                    | S31     |
| Figure S30. Fluorescence lifetimes in DCM                                                        | S32     |
| Figure S31. Fluorescence lifetimes in ACN                                                        | S33     |
| Table S9. Fluorescence lifetimes                                                                 | S33     |
| Figure S32. Transient absorption spectra                                                         | S34     |
| Figure S33. Transient absorption spectra                                                         | S35     |
| DFT/TD-DFT calculation details                                                                   | S36     |
| Table S10. DFT calculation: Summary of energies in ground state geometry                         | S36     |
| Figure S34. Frontier orbital distributions (HOMO-1, HOMO, LUMO, LUMO+1)                          | S37     |
| Table S11-S15. DFT calculation: Cartesian coordinates for optimized structure                    | S38-S42 |
| Figure S35-S39. DFT calculation: Energy levels and isodensity plots                              | S43-S45 |
| Figure S40-S44. TD-DFT calculation: Electronic transition and simulated spectra                  | S45-S47 |
| Table S16-S20. TD-DFT calculation: Transition assignment                                         | S48-S52 |
| Reference                                                                                        | S53     |

## Experimental section

### Preparation of single crystal **CN**, **F**, and **Me**

Single crystal **CN**: vacuum dried pure sample of **CN** was taken in a vial and dissolved in  $\text{CHCl}_3/n$ -hexane (10:1) mixed solvent; by the slow evaporation at room temperature for about 4 weeks, a light brown **CN** single crystal was obtained. Single crystal **F** and **Me**: vacuum dried pure sample of **F** and **Me** was taken in a vial and dissolved in  $\text{CH}_2\text{Cl}_2/n$ -hexane (2:1) mixed solvent; by the slow evaporation at room temperature for about 4 weeks, pale yellow **F** and **Me** single crystal was obtained.

### X-ray crystal structure analysis

The preliminary examination and data collection were performed using a Bruker SMART CCD detector system single-crystal X-ray diffractometer equipped with a sealed-tube X-ray source (50 kV  $\times$  30 mA) using graphite-monochromated Mo  $K\alpha$  radiation ( $\lambda = 0.71073 \text{ \AA}$ ). Preliminary unit cell constants were determined using a set of 45 narrow-frame ( $0.3^\circ$  in  $\omega$ ) scans. The double pass method of scanning was used to exclude noise. Collected frames were integrated using an orientation matrix determined from narrow-frame scans. The SMART software package was used for data collection, and SAINT was used for frame integration.<sup>1</sup> Final cell constants were determined by global refinement of xyz centroids of reflections harvested from the entire data set. Structure solution and refinement were carried out using the SHELXTL-PLUS software package.<sup>2</sup> The crystallographic information has been deposited with the Cambridge Crystallographic Data Centre and assigned the CCDC code 2060789 for **CN**, 2060790 for **F**, 2060791 for **Me**.

### Photophysical measurements

The UV/Vis absorption spectra were recorded using a Sinco Mega-2100 spectrophotometer in dual beam mode, and the fluorescence emission measurements were carried out using Shimadzu fluorometer (RF-6000) with a wavelength resolution of  $\sim 1 \text{ nm}$ . Fluorescence lifetimes were measured by PicoQuant FluoTime 200 that takes advantage of the time-correlated single photon counting method. A pulsed diode laser operated at 20 MHz repetition rate was used as the excitation source. The FWHM of a laser pulse was typically 45 ps, and the instrument response function was  $\sim 190 \text{ ps}$  when the Hamamatsu photomultiplier tube (H5783-01) was used. The emission quantum yields ( $\Phi_f$ ) were calculated using William's comparative method for samples of five different concentrations of (1–5)  $\mu\text{M}$ , using 9,10-diphenylanthracene ( $\Phi_f = 0.95$ , ethanol) as a reference standard.<sup>3</sup>

### Femtosecond transient absorption (fs-TA) measurements

The sub-picosecond time-resolved absorption spectra were collected using a pump–probe transient absorption spectroscopy system (Ultrafast Systems, Helios). The pump light was generated by using a

regenerative amplified titanium sapphire laser system (Spectra Physics, Spitfire Ace, 1 kHz) pumped by a diode-pumped Q-switched laser (Spectra Physics, Empower). The seed pulse was generated using a titanium sapphire laser (Spectra Physics, MaiTai SP). The pulses (340 nm) generated from an optical parametric amplifier (Spectra Physics, TOPAS prime) were used as the excitation pulse. And a white light continuum pulse, which was generated by focusing the residual of the fundamental light to a thin Sapphire crystal after the controlled optical delay, was used as a probe beam and directed to the sample cell with 2.0 mm of the optical path and detected with a CCD detector installed in the absorption spectroscope. The pump pulse was chopped by the mechanical chopper synchronized to one-half of the laser repetition rate, resulting in a pair of the spectra with and without the pump, from which the absorption change induced by the pump pulse was estimated.

### **Cyclic Voltammetry (CV)**

A CH Instruments 701D potentiostat was used for electrochemical measurements, and cyclic voltammetry (CV) was performed in an electrolytic solution prepared using 1 mM of electroactive compounds and 0.1 M tetrabutylammonium perchlorate ( $\text{Bu}_4\text{NClO}_4$ ) in deoxygenated dichloromethane. A three-electrode configuration, platinum wire, glassy carbon, and SCE were used as working, counter, and reference electrodes, respectively.

### **Density functional theory calculations**

Density functional theory (DFT) calculations were performed by using Gaussian'16 software package. Full geometry optimizations in their ground state were performed using the B3LYP functional and the 6-31G (d, p) basis set for all atoms. The excitation energies and oscillator strengths for the lowest 100 singlet-singlet transitions at the optimized geometry in the ground state were obtained in time-dependent DFT (TD-DFT) calculations using the same basis set and functional as for the ground state. All Isodensity plots of the frontier orbitals were visualized by Chem3D Ultra and GaussView software.

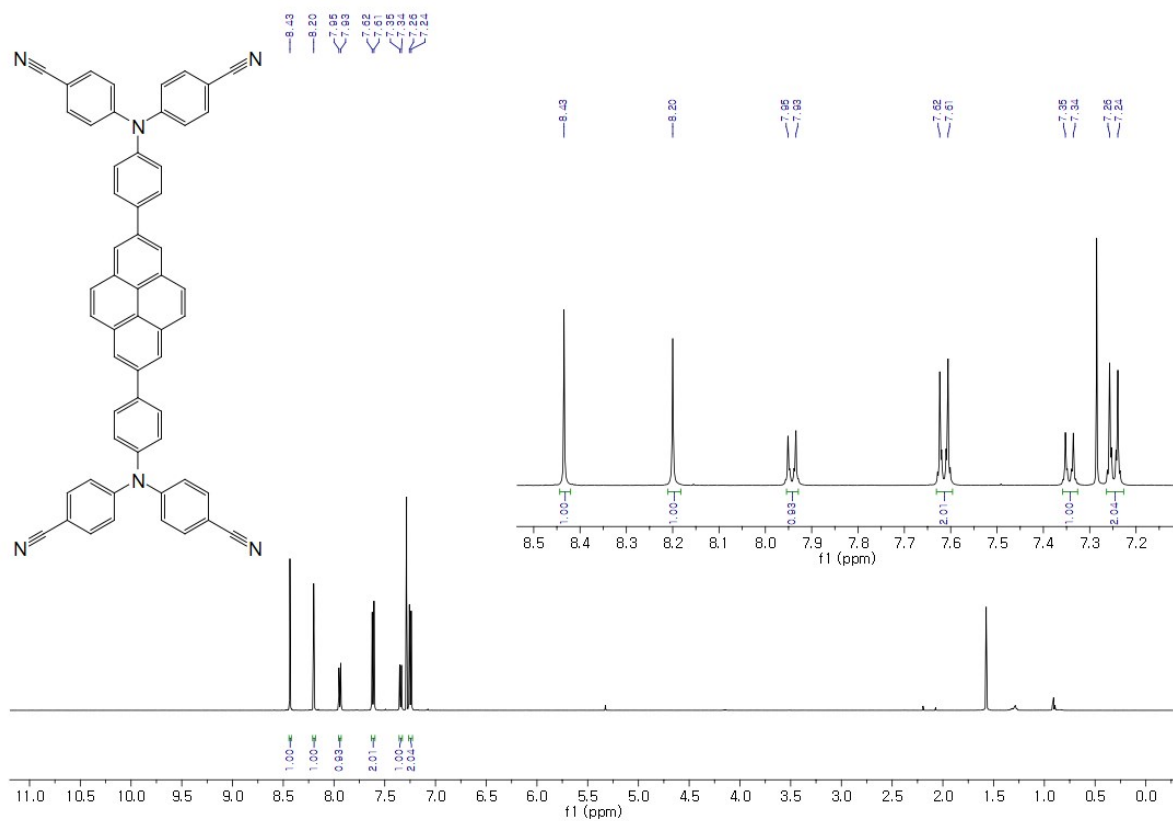

Figure S1. <sup>1</sup>H-NMR spectrum of CN in CDCl<sub>3</sub> (500MHz, 293K)

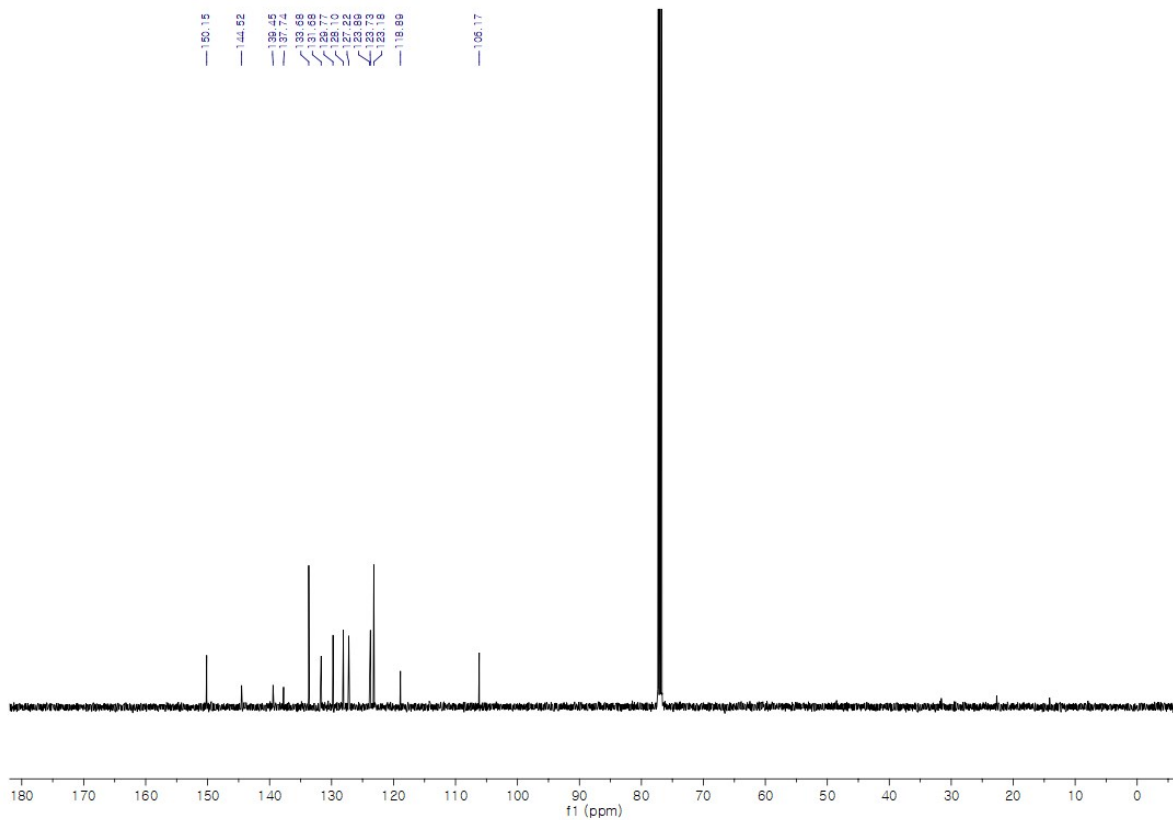

Figure S2. <sup>13</sup>C{<sup>1</sup>H}-NMR spectrum of CN in CDCl<sub>3</sub> (125MHz, 293K)

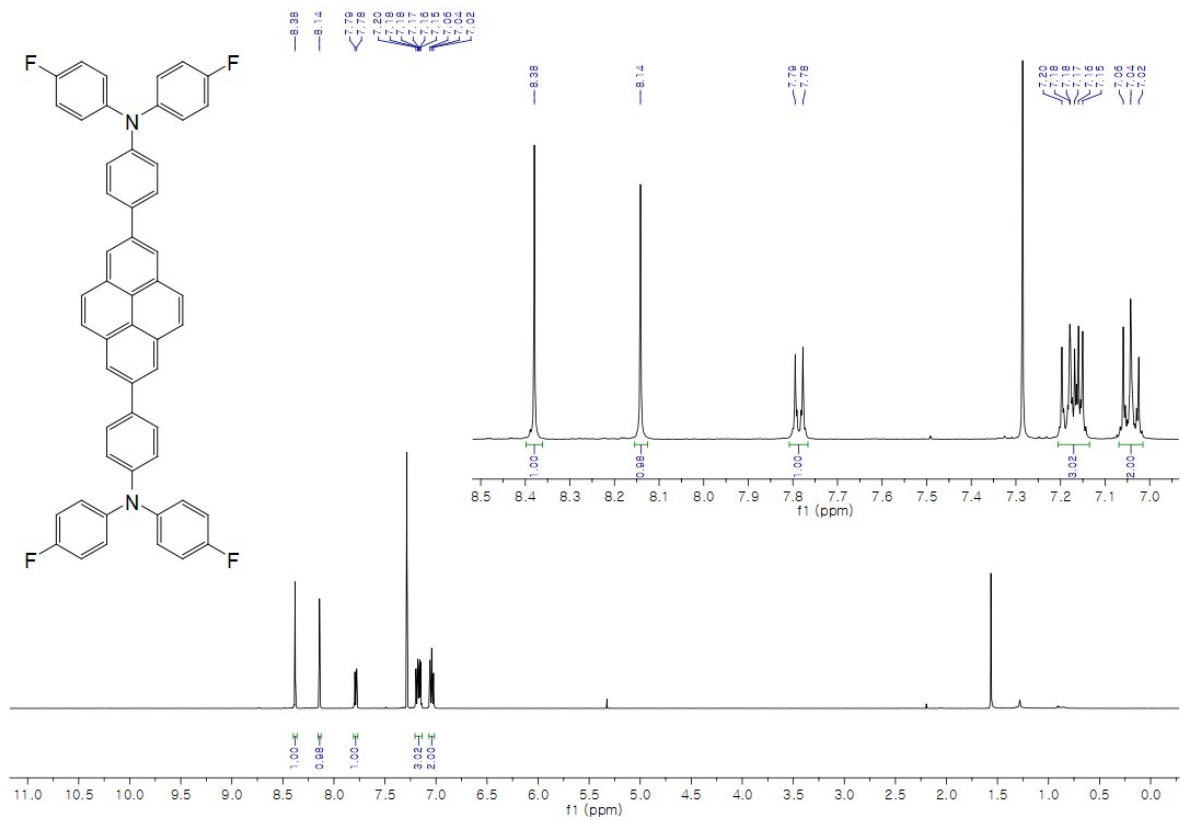

Figure S3. <sup>1</sup>H-NMR spectrum of **F** in CDCl<sub>3</sub> (500MHz, 293K)

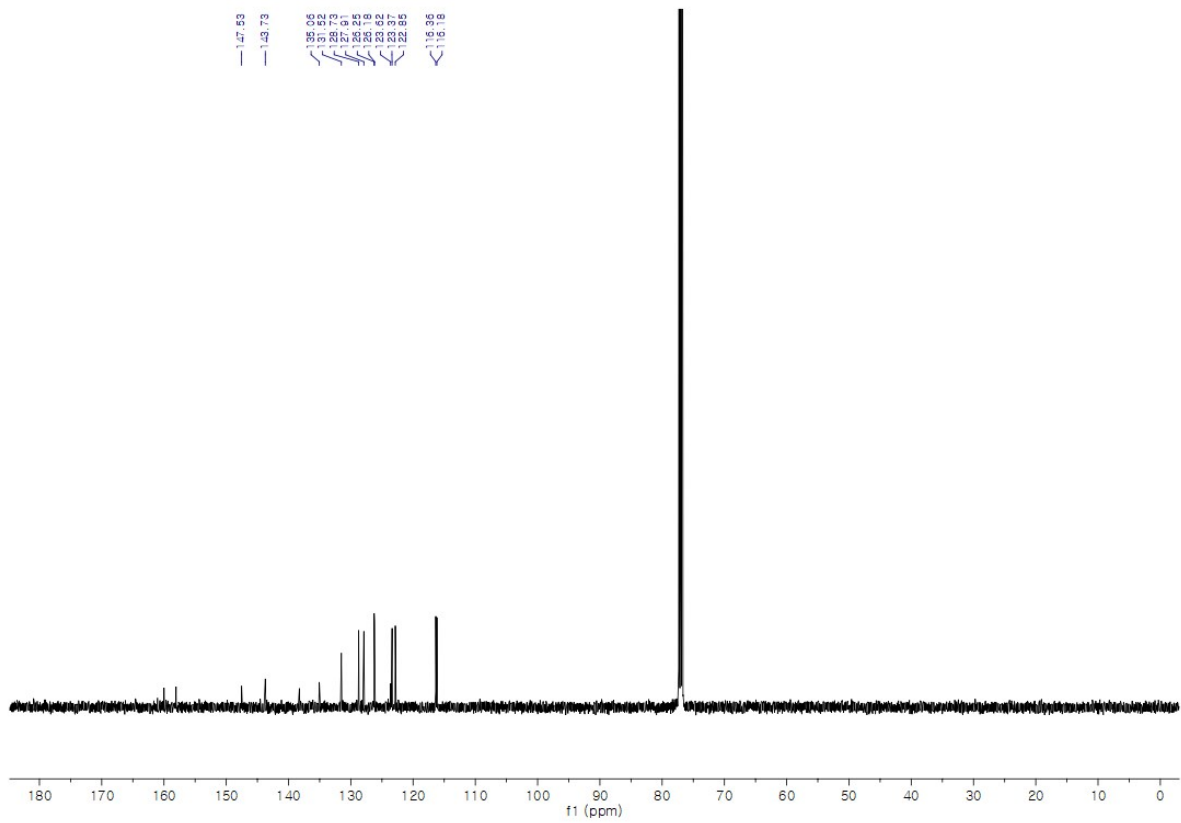

Figure S4. <sup>13</sup>C{<sup>1</sup>H}-NMR spectrum of **F** in CDCl<sub>3</sub> (125MHz, 293K)

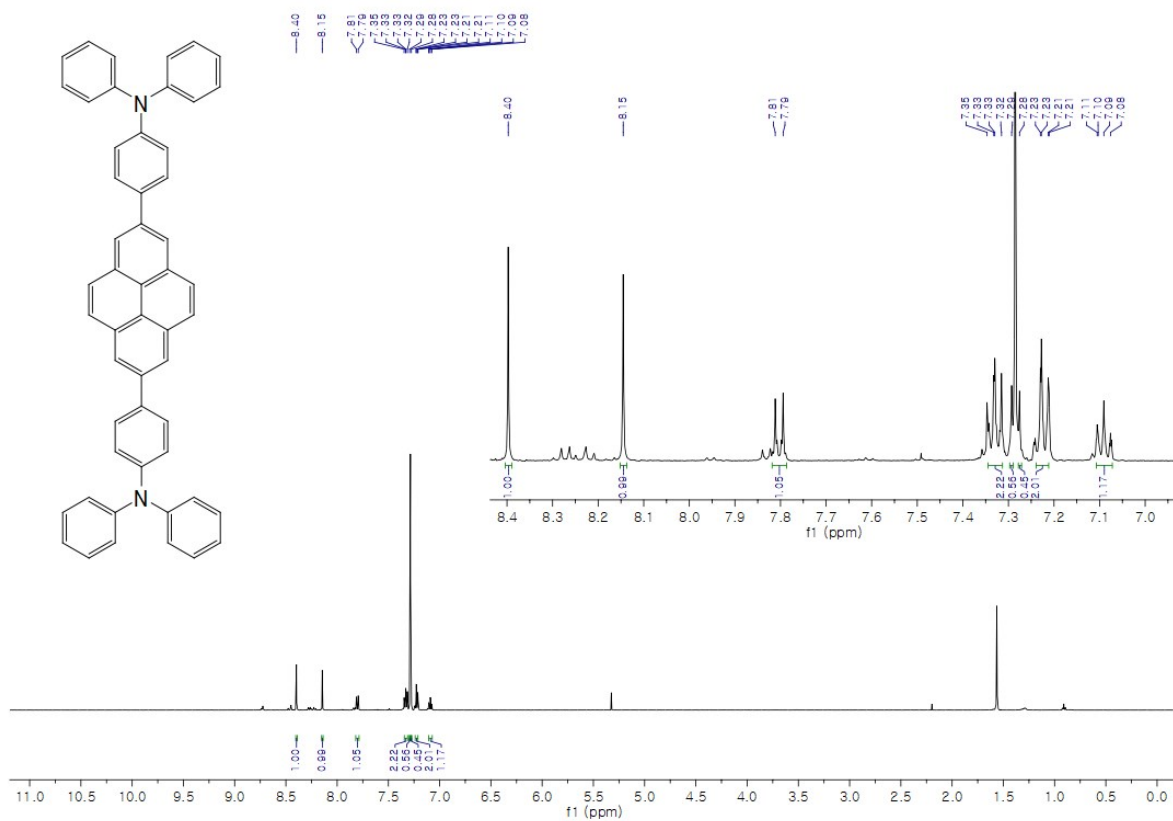

Figure S5. <sup>1</sup>H-NMR spectrum of **H** in CDCl<sub>3</sub> (500MHz, 293K)

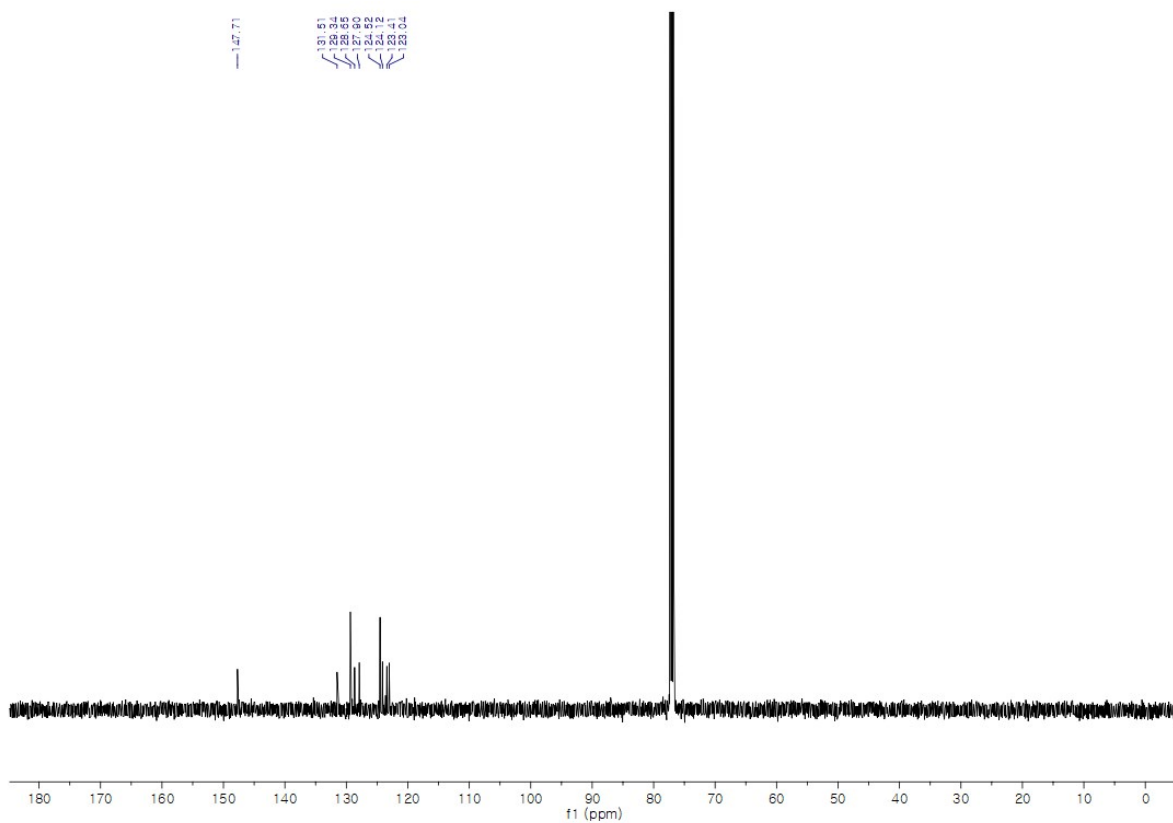

Figure S6. <sup>13</sup>C{<sup>1</sup>H}-NMR spectrum of **H** in CDCl<sub>3</sub> (125MHz, 293K)

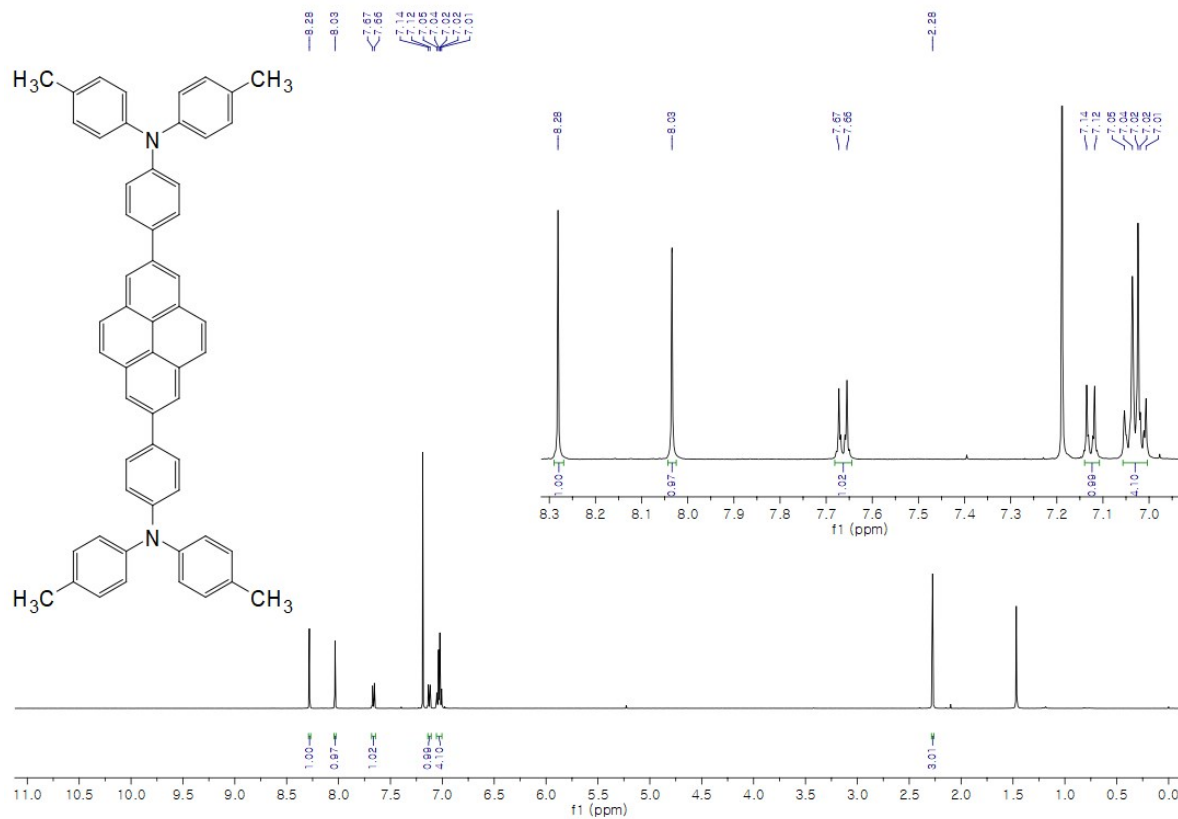

Figure S7.  $^1\text{H-NMR}$  spectrum of **Me** in  $\text{CDCl}_3$  (500MHz, 293K)

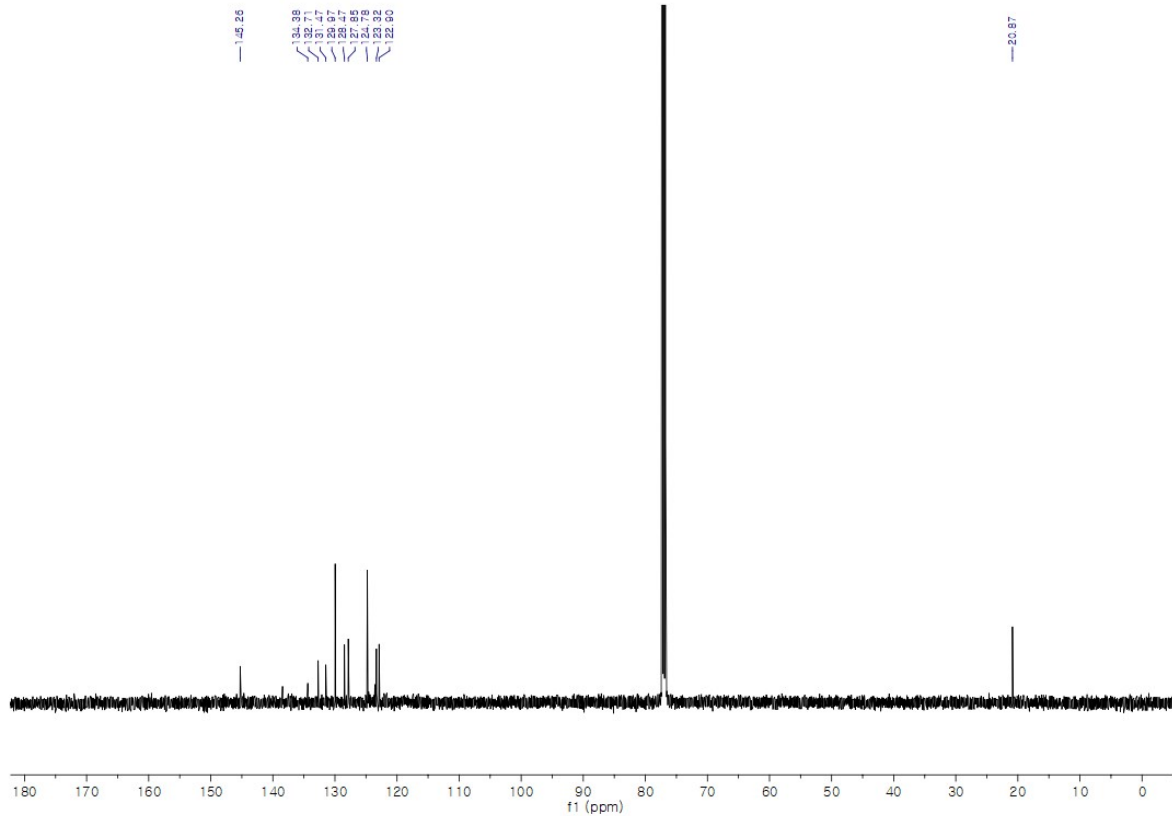

Figure S8.  $^{13}\text{C}\{^1\text{H}\}$ -NMR spectrum of **Me** in  $\text{CDCl}_3$  (125MHz, 293K)



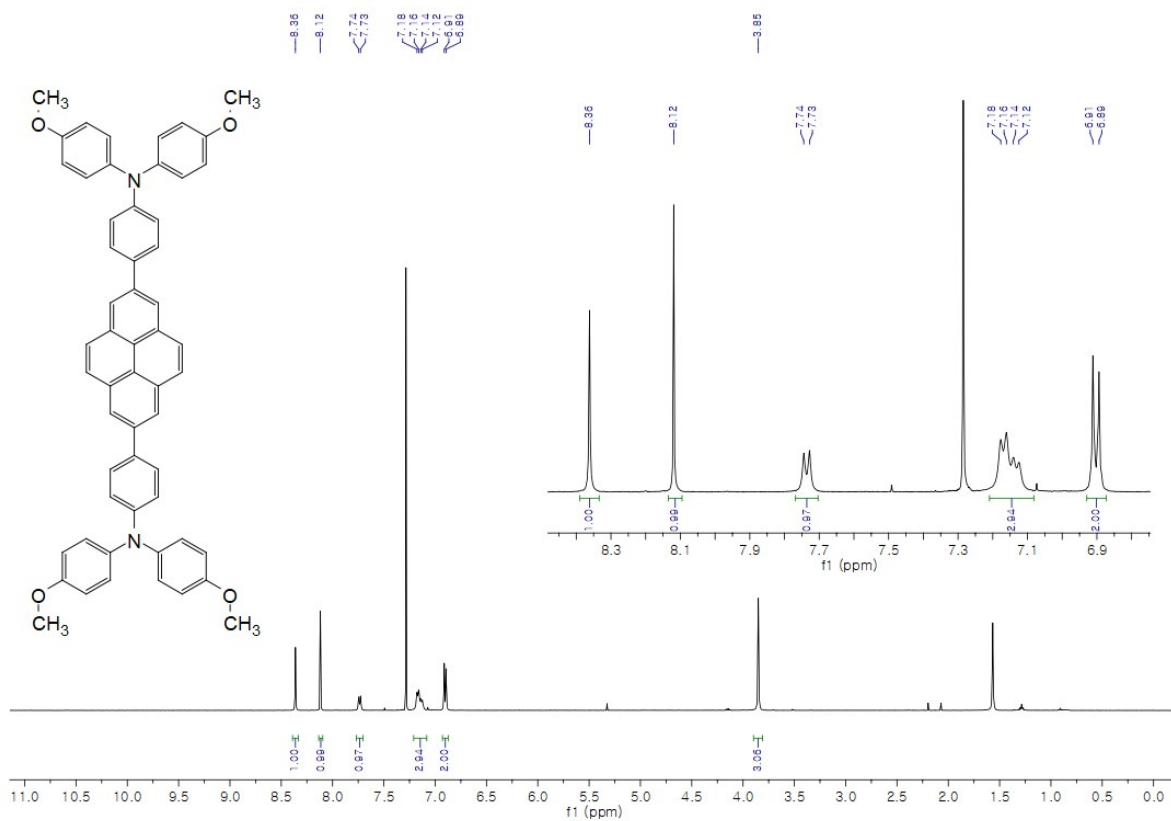

Figure S9.  $^1\text{H-NMR}$  spectrum of **OMe** in  $\text{CDCl}_3$  (500MHz, 293K)

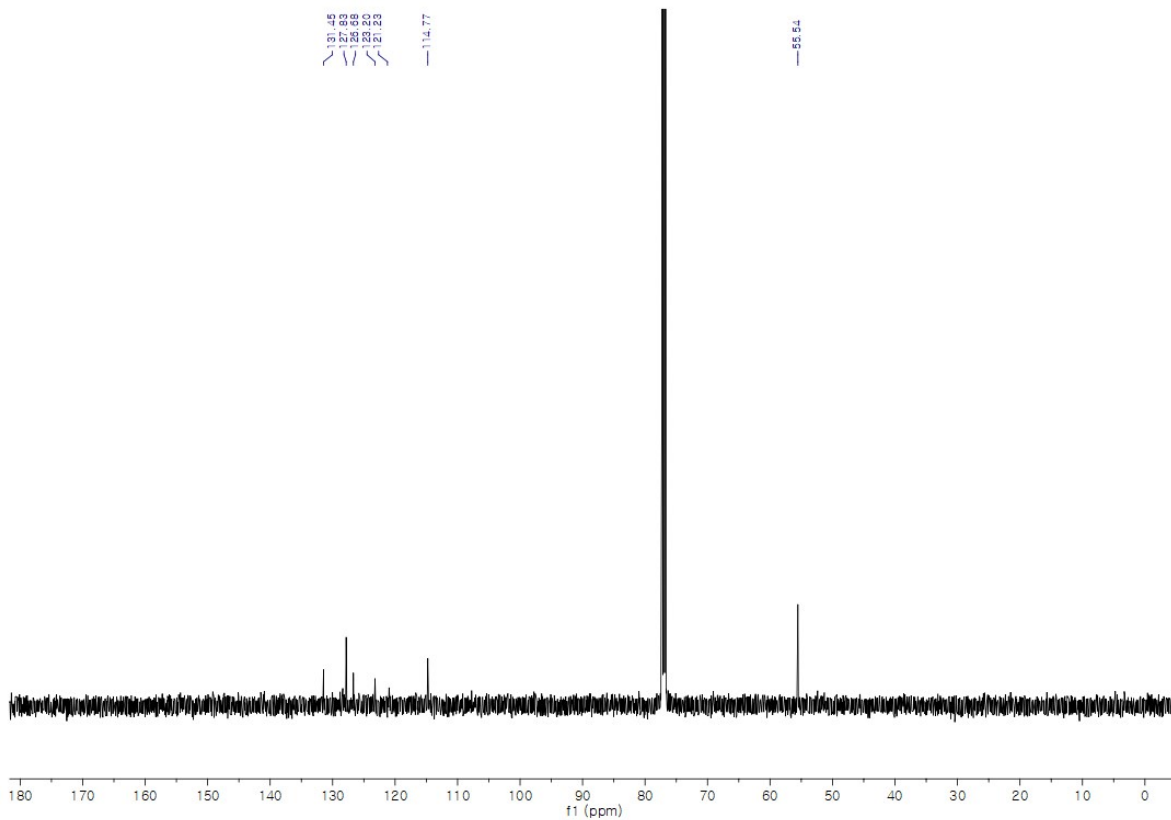

Figure S10.  $^{13}\text{C}\{^1\text{H}\}$ -NMR spectrum of **OMe** in  $\text{CDCl}_3$  (125MHz, 293K)

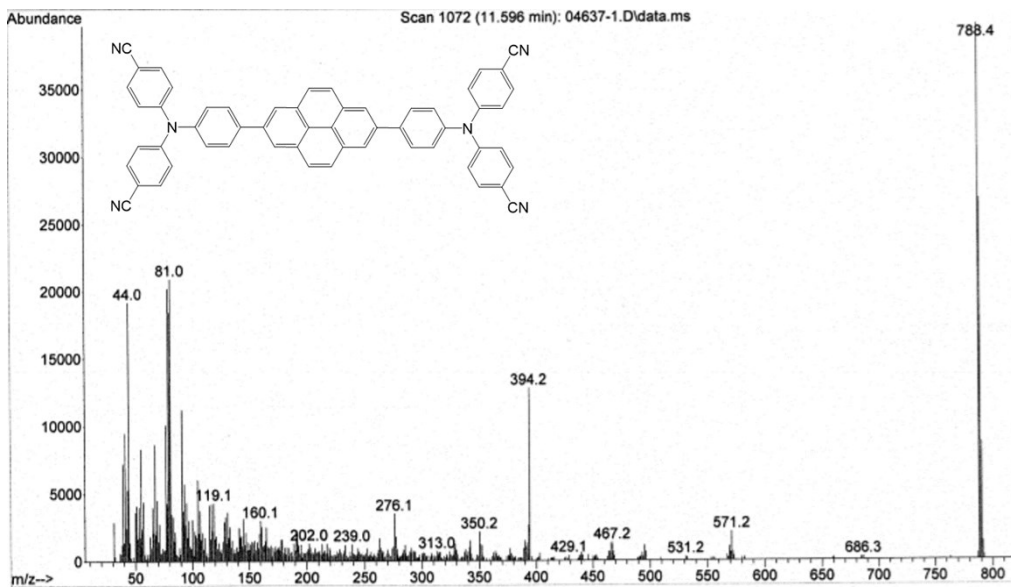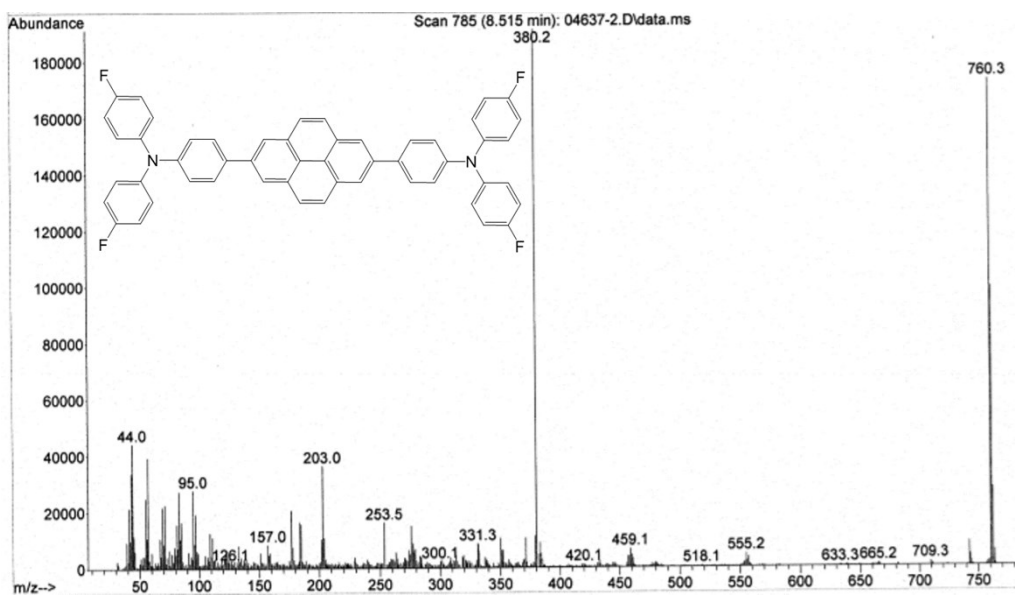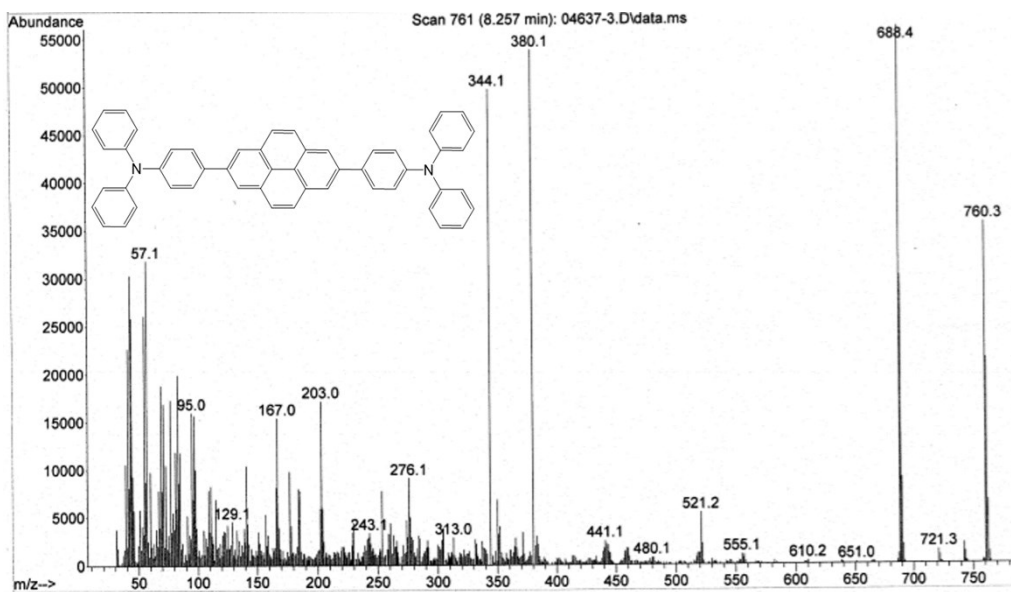

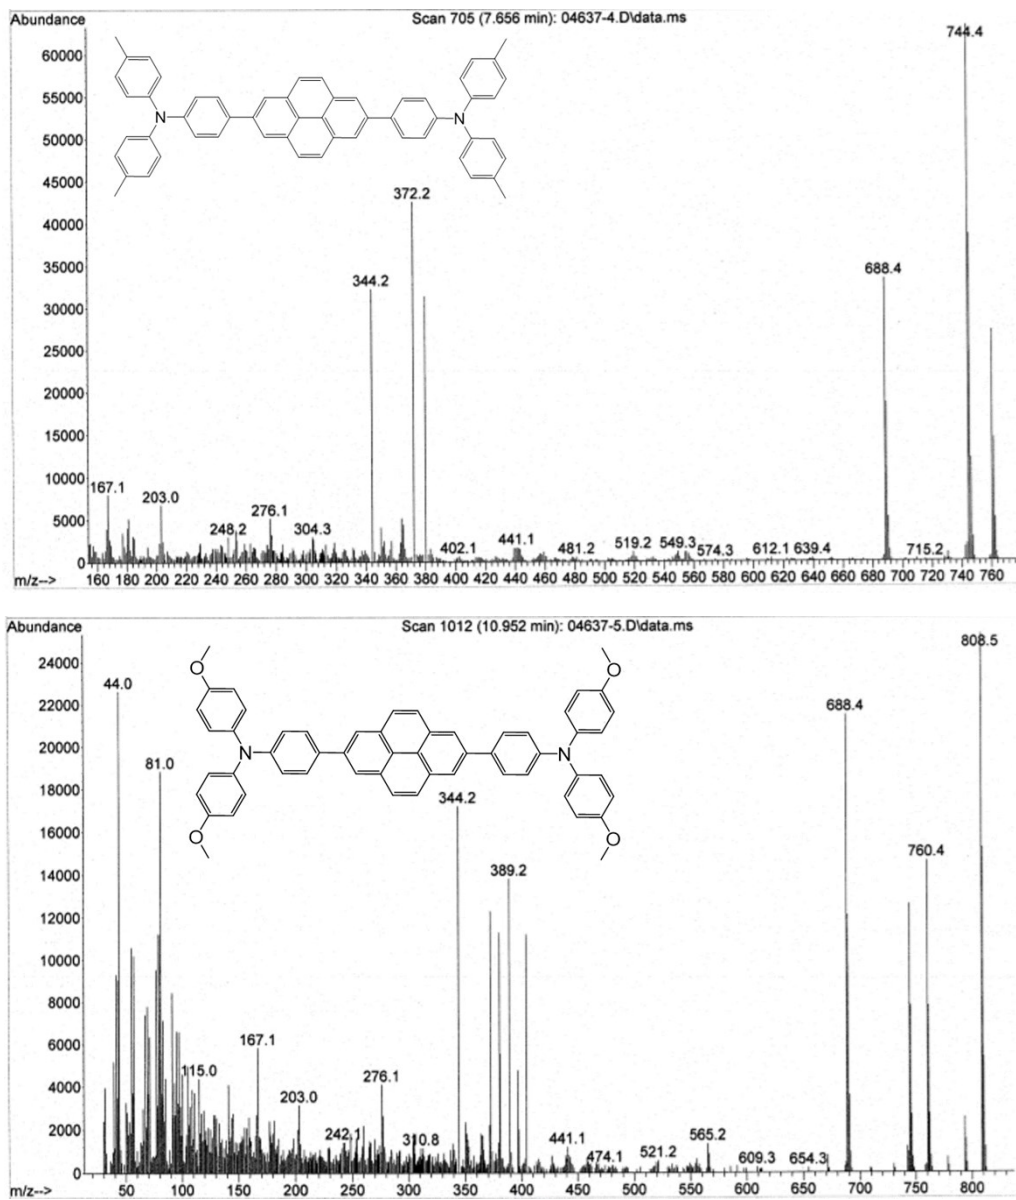

Figure S11. GC-MS data of CN-OMe.

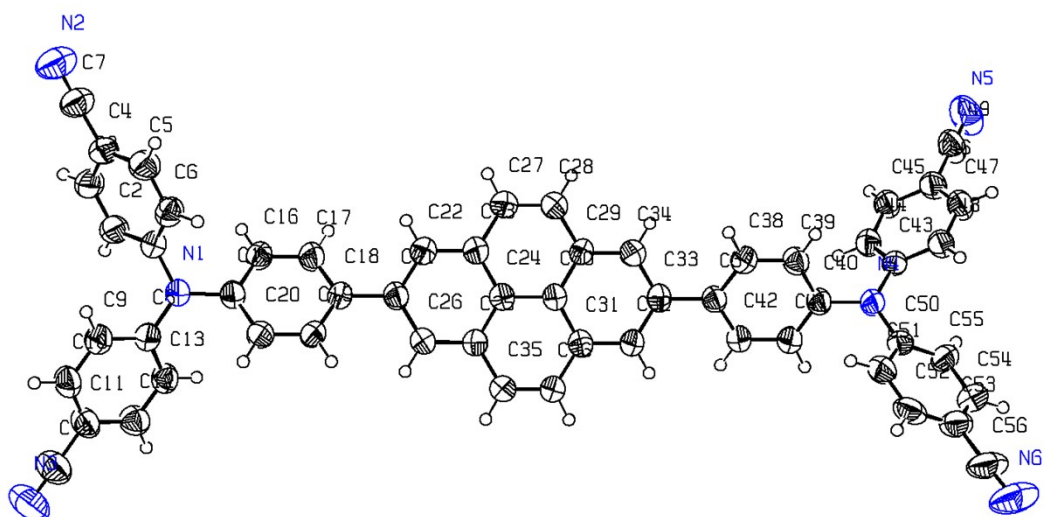

Figure S12. ORTEP drawings of **CN**. Ellipsoid contour percent probability level is 50%.

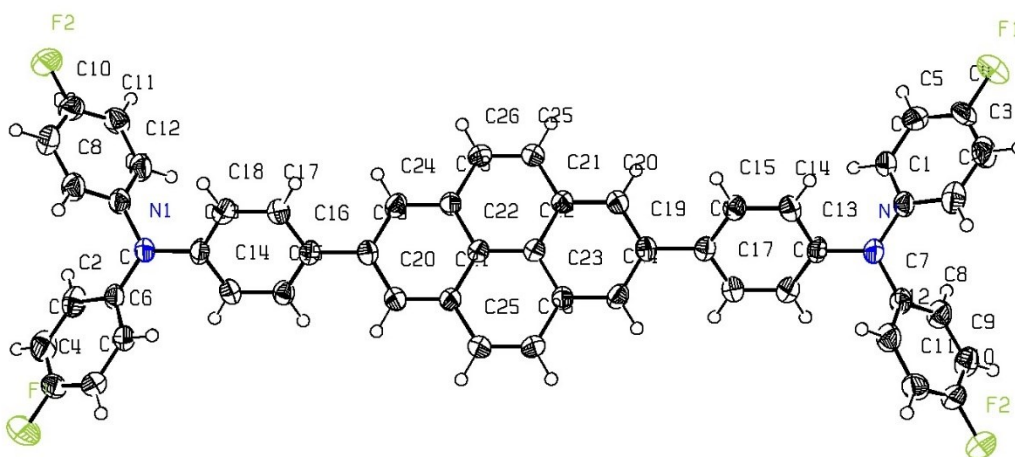

Figure S13. ORTEP drawings of **F**. Ellipsoid contour percent probability level is 50%.

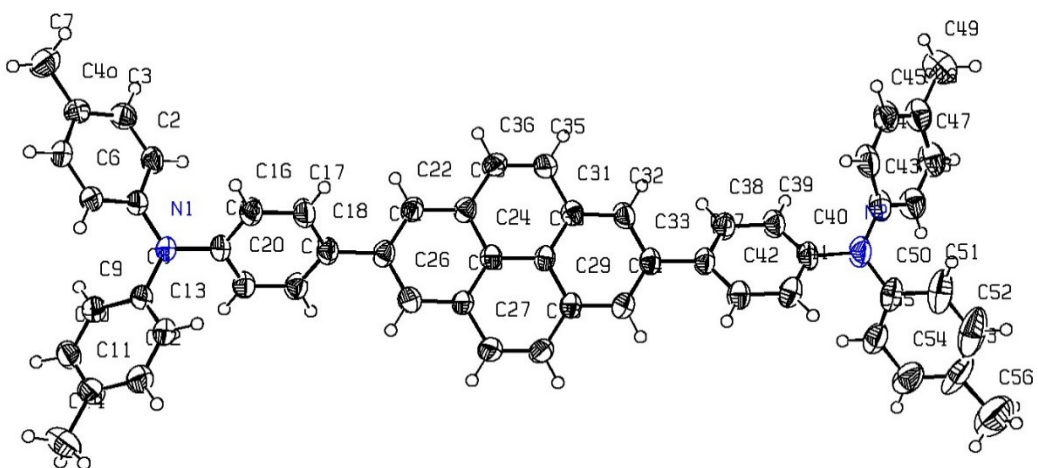

Figure S14. ORTEP drawings of **Me**. Ellipsoid contour percent probability level is 50%.

Table S1. Crystal data and structure refinement for CN

| Comp.                             | CN                                             |                |
|-----------------------------------|------------------------------------------------|----------------|
| Empirical formula                 | C <sub>56</sub> H <sub>32</sub> N <sub>6</sub> |                |
| Formula weight                    | 788.87                                         |                |
| Temperature                       | 296(2) K                                       |                |
| Wavelength                        | 0.71073 Å                                      |                |
| Crystal system                    | Triclinic                                      |                |
| Space group                       | P-1                                            |                |
| Unit cell dimensions              | a = 9.275(11) Å                                | α = 92.33(4)°. |
|                                   | b = 12.946(14) Å                               | β = 96.81(5)°. |
|                                   | c = 20.99(3) Å                                 | γ = 92.08(5)°. |
| Volume                            | 2499(5) Å <sup>3</sup>                         |                |
| Z                                 | 2                                              |                |
| Density (calculated)              | 1.049 Mg/m <sup>3</sup>                        |                |
| Absorption coefficient            | 0.063 mm <sup>-1</sup>                         |                |
| F(000)                            | 820                                            |                |
| Crystal size                      | 0.198 x 0.092 x 0.050 mm <sup>3</sup>          |                |
| Theta range for data collection   | 1.956 to 26.000°.                              |                |
| Index ranges                      | -11 ≤ h ≤ 11, -15 ≤ k ≤ 15, -25 ≤ l ≤ 25       |                |
| Reflections collected             | 53139                                          |                |
| Independent reflections           | 9813 [R(int) = 0.0819]                         |                |
| Completeness to theta = 25.242°   | 99.9 %                                         |                |
| Absorption correction             | Semi-empirical from equivalents                |                |
| Max. and min. transmission        | 0.7457 and 0.6949                              |                |
| Refinement method                 | Full-matrix least-squares on F <sup>2</sup>    |                |
| Data / restraints / parameters    | 9813 / 0 / 559                                 |                |
| Goodness-of-fit on F <sup>2</sup> | 1.032                                          |                |
| Final R indices [I > 2σ(I)]       | R1 = 0.0720, wR2 = 0.1955                      |                |
| R indices (all data)              | R1 = 0.1665, wR2 = 0.2692                      |                |
| Extinction coefficient            | n/a                                            |                |
| Largest diff. peak and hole       | 0.231 and -0.226 e.Å <sup>-3</sup>             |                |

Table S2. Crystal data and structure refinement for **F**

| Comp.                             | <b>F</b>                                                      |                  |
|-----------------------------------|---------------------------------------------------------------|------------------|
| Empirical formula                 | C <sub>52</sub> H <sub>32</sub> F <sub>4</sub> N <sub>2</sub> |                  |
| Formula weight                    | 760.79                                                        |                  |
| Temperature                       | 223(2) K                                                      |                  |
| Wavelength                        | 0.71073 Å                                                     |                  |
| Crystal system                    | Monoclinic                                                    |                  |
| Space group                       | P2 <sub>1</sub> /n                                            |                  |
| Unit cell dimensions              | a = 10.7743(11) Å                                             | α = 90°.         |
|                                   | b = 11.1285(13) Å                                             | β = 108.374(2)°. |
|                                   | c = 16.6643(19) Å                                             | γ = 90°.         |
| Volume                            | 1896.2(4) Å <sup>3</sup>                                      |                  |
| Z                                 | 2                                                             |                  |
| Density (calculated)              | 1.332 Mg/m <sup>3</sup>                                       |                  |
| Absorption coefficient            | 0.091 mm <sup>-1</sup>                                        |                  |
| F(000)                            | 788                                                           |                  |
| Crystal size                      | 0.254 x 0.143 x 0.051 mm <sup>3</sup>                         |                  |
| Theta range for data collection   | 2.238 to 28.282°.                                             |                  |
| Index ranges                      | -14 ≤ h ≤ 14, -14 ≤ k ≤ 14, -22 ≤ l ≤ 22                      |                  |
| Reflections collected             | 55633                                                         |                  |
| Independent reflections           | 4705 [R(int) = 0.1727]                                        |                  |
| Completeness to theta = 25.242°   | 100.0 %                                                       |                  |
| Absorption correction             | Semi-empirical from equivalents                               |                  |
| Max. and min. transmission        | 0.7457 and 0.6630                                             |                  |
| Refinement method                 | Full-matrix least-squares on F <sup>2</sup>                   |                  |
| Data / restraints / parameters    | 4705 / 0 / 262                                                |                  |
| Goodness-of-fit on F <sup>2</sup> | 1.034                                                         |                  |
| Final R indices [I > 2σ(I)]       | R1 = 0.0843, wR2 = 0.1445                                     |                  |
| R indices (all data)              | R1 = 0.1732, wR2 = 0.1743                                     |                  |
| Extinction coefficient            | n/a                                                           |                  |
| Largest diff. peak and hole       | 0.186 and -0.253 e.Å <sup>-3</sup>                            |                  |

Table S3. Crystal data and structure refinement for **Me**

| Comp.                             | <b>Me</b>                                      |                  |
|-----------------------------------|------------------------------------------------|------------------|
| Empirical formula                 | C <sub>56</sub> H <sub>44</sub> N <sub>2</sub> |                  |
| Formula weight                    | 744.93                                         |                  |
| Temperature                       | 223(2) K                                       |                  |
| Wavelength                        | 0.71073 Å                                      |                  |
| Crystal system                    | Monoclinic                                     |                  |
| Space group                       | C2/c                                           |                  |
| Unit cell dimensions              | a = 36.361(3) Å                                | α = 90°.         |
|                                   | b = 7.2580(6) Å                                | β = 110.615(2)°. |
|                                   | c = 33.477(3) Å                                | γ = 90°.         |
| Volume                            | 8268.9(12) Å <sup>3</sup>                      |                  |
| Z                                 | 8                                              |                  |
| Density (calculated)              | 1.197 Mg/m <sup>3</sup>                        |                  |
| Absorption coefficient            | 0.069 mm <sup>-1</sup>                         |                  |
| F(000)                            | 3152                                           |                  |
| Crystal size                      | 0.242 x 0.109 x 0.019 mm <sup>3</sup>          |                  |
| Theta range for data collection   | 2.287 to 26.003°.                              |                  |
| Index ranges                      | -44 ≤ h ≤ 44, -8 ≤ k ≤ 8, -41 ≤ l ≤ 41         |                  |
| Reflections collected             | 113454                                         |                  |
| Independent reflections           | 8096 [R(int) = 0.2080]                         |                  |
| Completeness to theta = 25.242°   | 99.9 %                                         |                  |
| Absorption correction             | Semi-empirical from equivalents                |                  |
| Max. and min. transmission        | 0.7453 and 0.6737                              |                  |
| Refinement method                 | Full-matrix least-squares on F <sup>2</sup>    |                  |
| Data / restraints / parameters    | 8096 / 6 / 527                                 |                  |
| Goodness-of-fit on F <sup>2</sup> | 1.018                                          |                  |
| Final R indices [I > 2σ(I)]       | R1 = 0.0661, wR2 = 0.1422                      |                  |
| R indices (all data)              | R1 = 0.1757, wR2 = 0.1931                      |                  |
| Extinction coefficient            | n/a                                            |                  |
| Largest diff. peak and hole       | 0.402 and -0.340 e.Å <sup>-3</sup>             |                  |

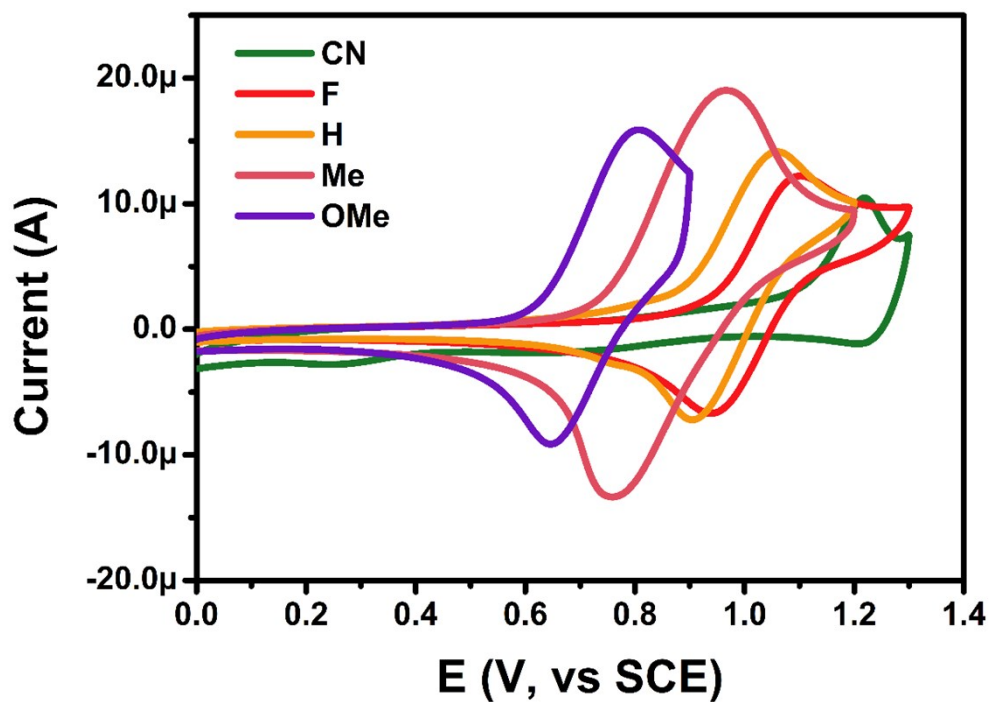

Figure S15. CV curves of CN-OMe in  $\text{CH}_2\text{Cl}_2$  solution containing 0.1 M TBAP as electrolyte, at a scan rate of  $0.1 \text{ Vs}^{-1}$ .

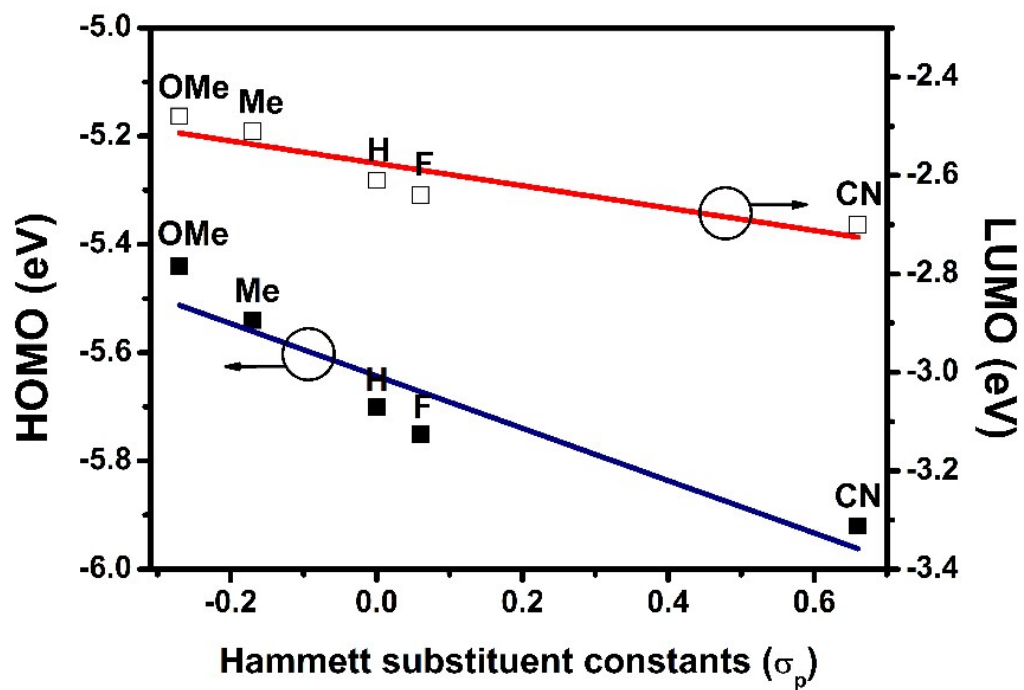

Figure S16. Plots of experimental HOMO (■) and LUMO (□) levels versus the Hammett substituent constants ( $\sigma_p$ ).



Table S4. Energy band gap properties of **CN**, **F**, **H**, **Me**, and **OMe**.

|            | $HOMO^a$ | $LUMO^b$ | $E_g^{opt}$ | $HOMO^c$ | $LUMO^c$ | $E_g^{cal}$ |
|------------|----------|----------|-------------|----------|----------|-------------|
|            | (eV)     | (eV)     | (eV)        | (eV)     | (eV)     | (eV)        |
| <b>CN</b>  | -5.92    | -2.70    | 3.22        | -5.77    | -2.01    | 3.76        |
| <b>F</b>   | -5.75    | -2.64    | 3.11        | -5.00    | -1.58    | 3.42        |
| <b>H</b>   | -5.70    | -2.61    | 3.09        | -4.88    | -1.49    | 3.39        |
| <b>Me</b>  | -5.54    | -2.51    | 3.03        | -4.73    | -1.43    | 3.30        |
| <b>OMe</b> | -5.44    | -2.48    | 2.96        | -4.55    | -1.39    | 3.16        |

<sup>a</sup>  $E_{HOMO}$  (eV) =  $-e(E_{onset}^{ox} + 4.8)$ , <sup>b</sup>  $E_{LUMO}$  (eV) =  $-e(E_{HOMO} + E_g^{opt})$ , <sup>c</sup> Obtained by DFT calculation.

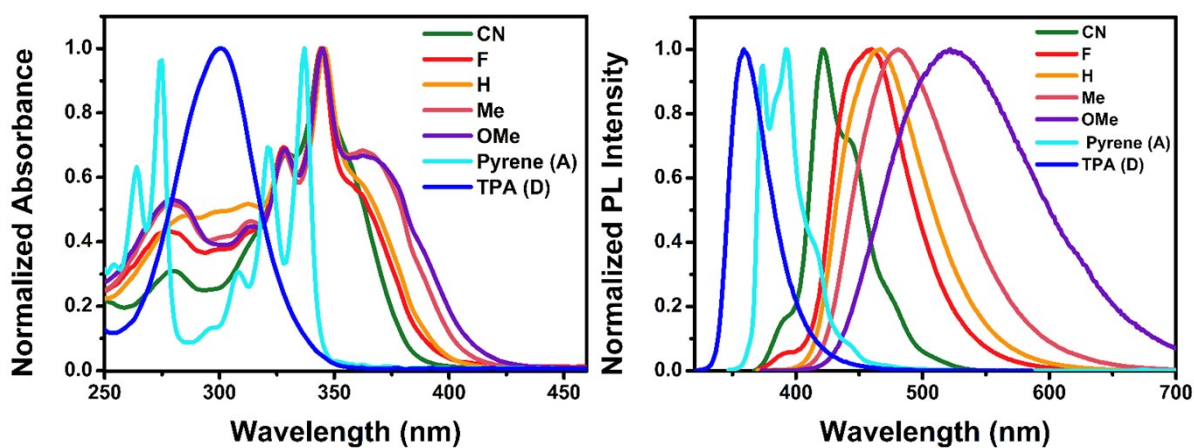

Figure S17. (top): UV-vis absorption spectra in  $CH_2Cl_2$  solution of TPA, Py and **CN-OMe**. (bottom): emission spectra in  $CH_2Cl_2$  solution of TPA, Py, and **CN-OMe**.

Table S5. Absorption and molar extinction coefficients of **CN-OMe** in  $CH_2Cl_2$  at 5  $\mu M$  concentration.

|            | Absorption (nm)    | Molar extinction coefficients ( $M^{-1} cm^{-1}$ ) |
|------------|--------------------|----------------------------------------------------|
| <b>CN</b>  | 279, 329, 344, 357 | 48327, 106251, 157815, 101468                      |
| <b>F</b>   | 278, 328, 344, 360 | 35874, 57809, 83588, 46418                         |
| <b>H</b>   | 283, 328, 345, 362 | 58991, 84669, 123213, 71849                        |
| <b>Me</b>  | 278, 328, 345, 363 | 64286, 83681, 124283, 84766                        |
| <b>OMe</b> | 279, 328, 345, 365 | 57743, 74844, 109158, 72224                        |

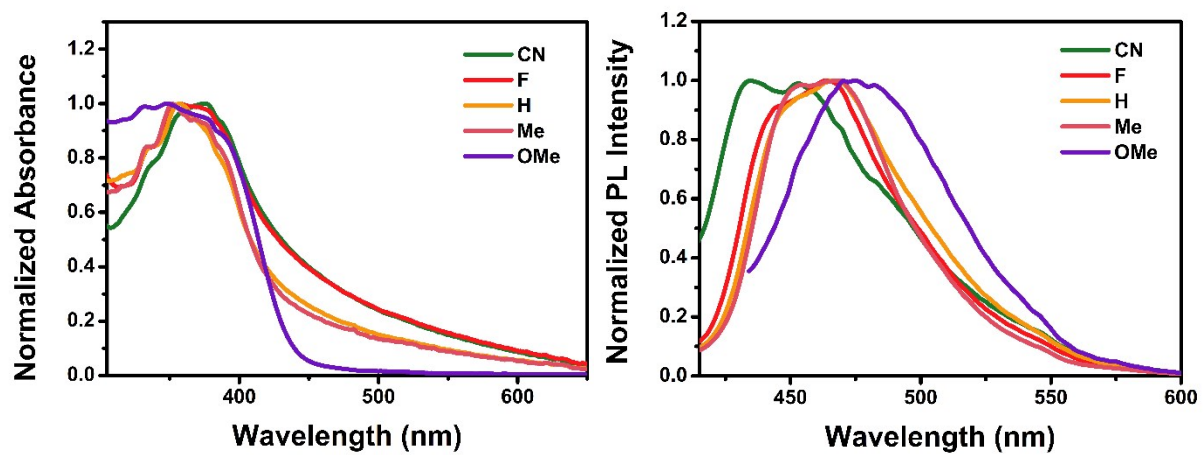

Figure S18. UV-vis absorption (left) and emission (right) spectra of **CN-OMe** in the solid state.

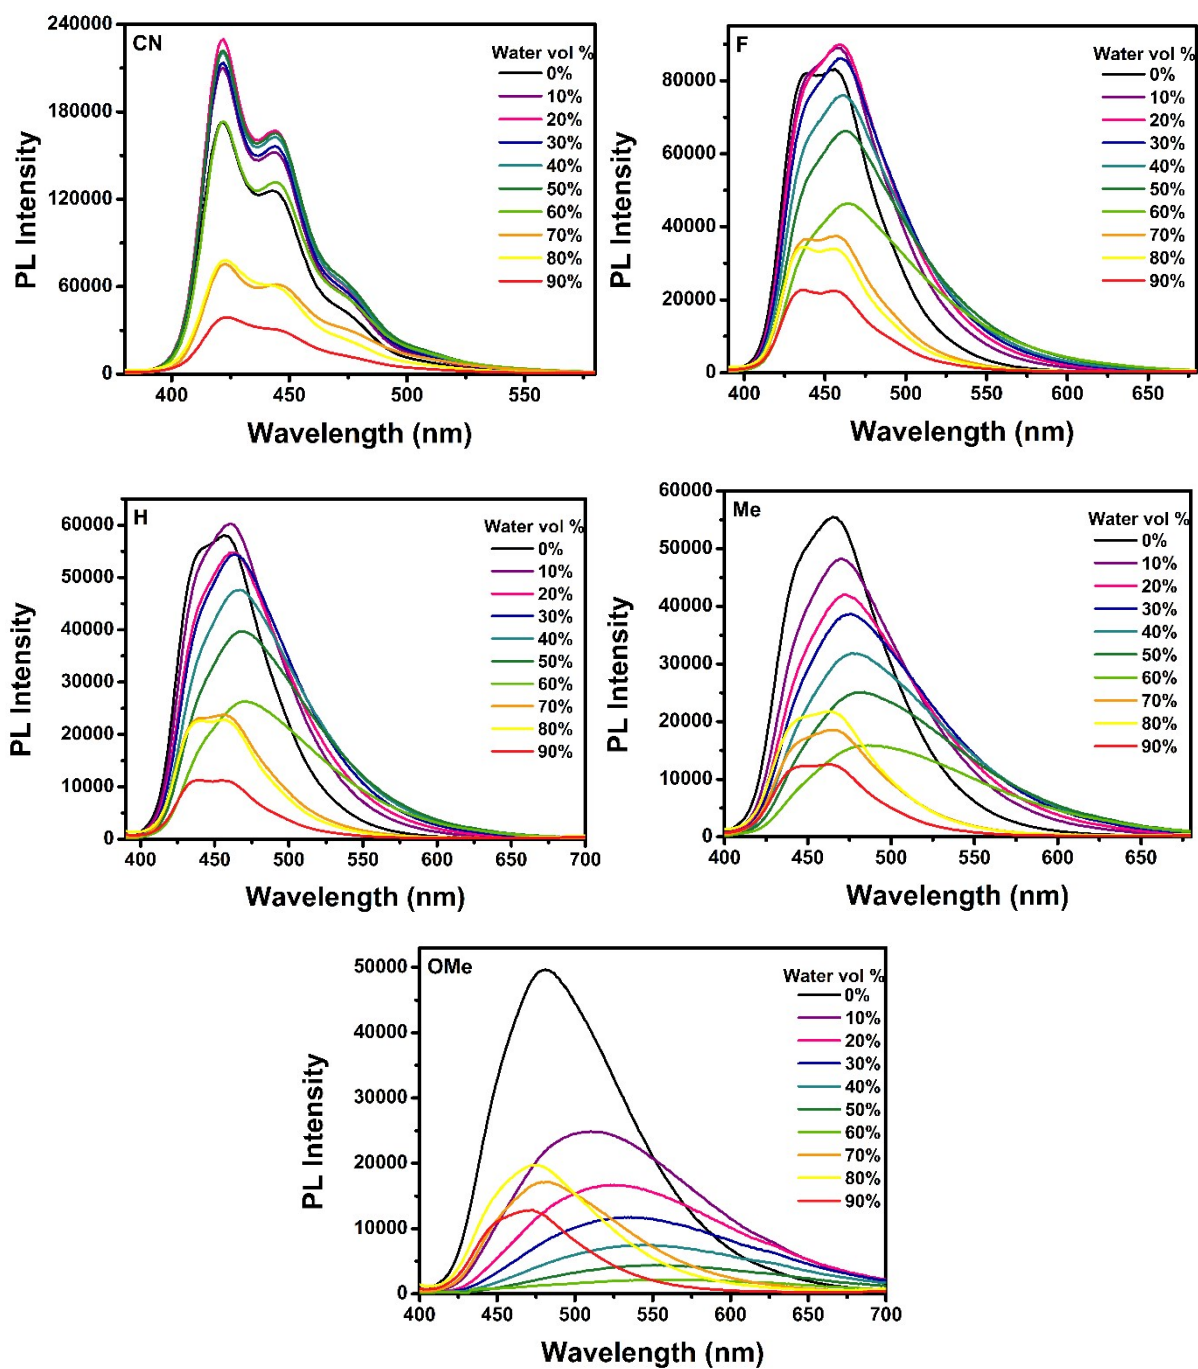

Figure S19. Emission spectra of CN-OMe in THF/H<sub>2</sub>O mixtures with different  $f_w$ .

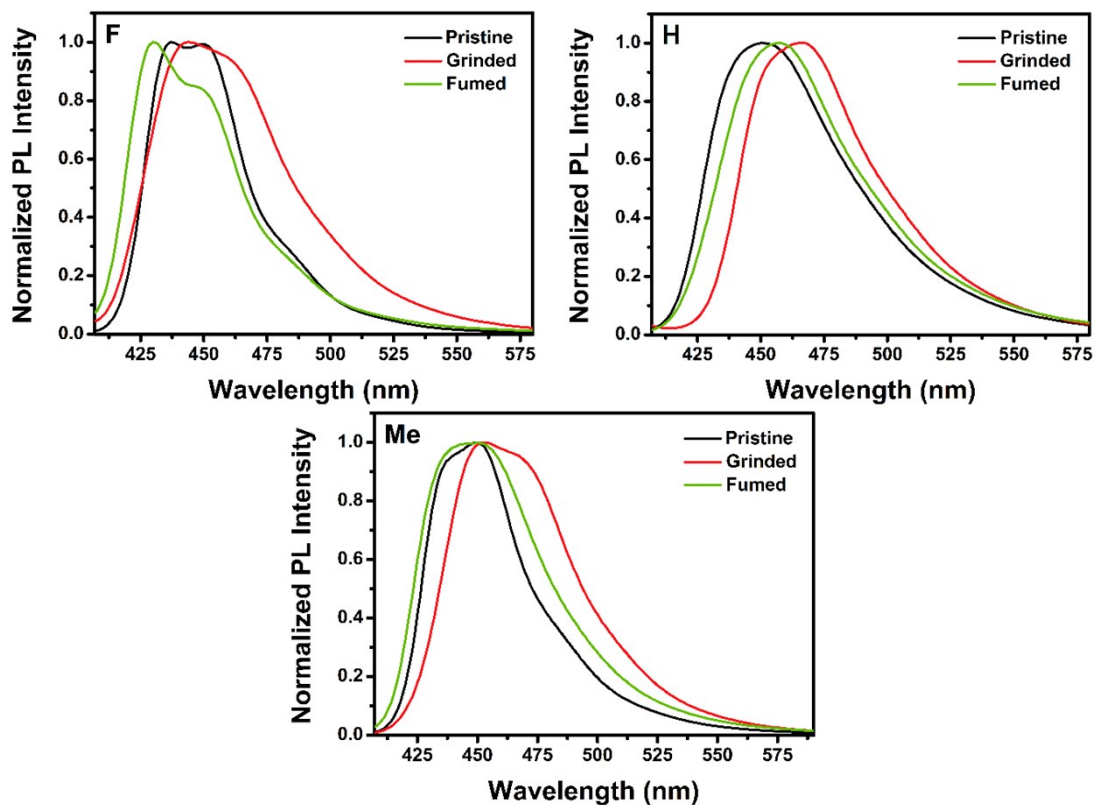

Figure S20. Emission spectra of **F–Me** in different solid-state: pristine, ground, and fumed powder.

Table S5. Emission peak/shoulders of **CN–OMe** in different solid-state

| <b>Compounds</b> | $\lambda_{em}$ (nm) | $\lambda_{em}$ (nm) | $\lambda_{em}$ (nm) |
|------------------|---------------------|---------------------|---------------------|
|                  | pristine            | grinding            | acetone fuming      |
| <b>CN</b>        | 432/446             | 440/456             | 430/448             |
| <b>F</b>         | 437/450             | 444                 | 430/448             |
| <b>H</b>         | 450                 | 466                 | 458                 |
| <b>Me</b>        | 449                 | 453                 | 450                 |
| <b>OMe</b>       | 481                 | 481                 | 483                 |

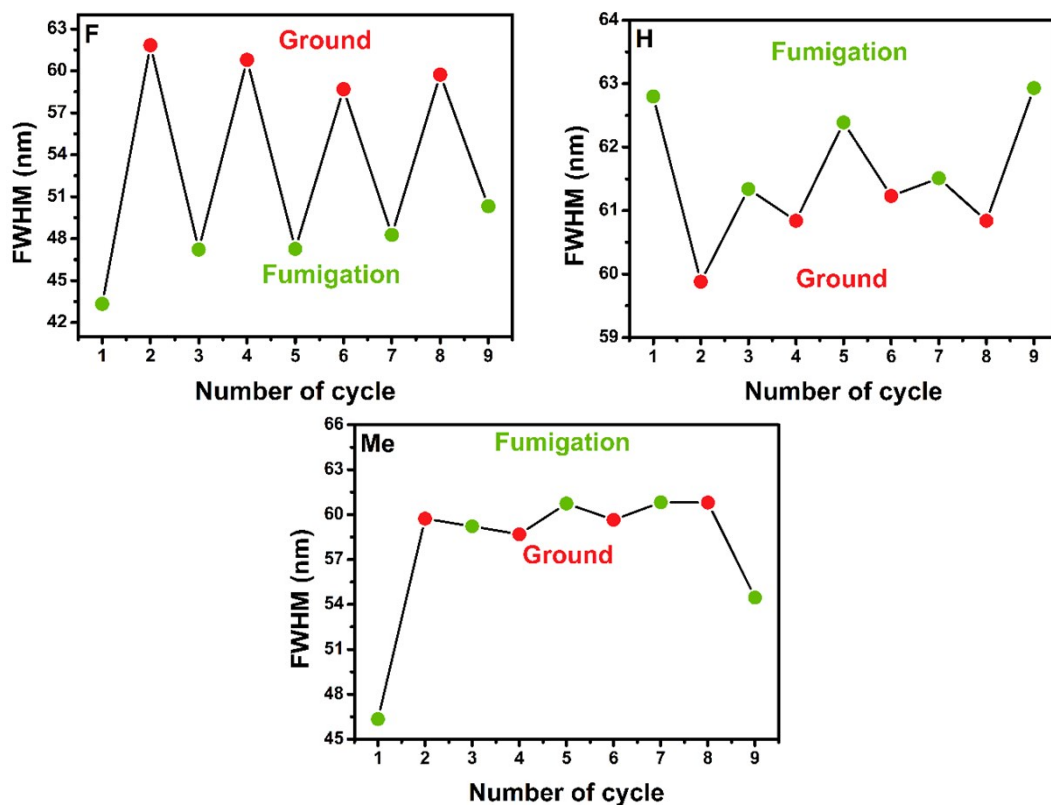

Figure S21. Reversible switching of emission of pristine powder **F–Me** by repeating grinding-acetone fuming cycles.

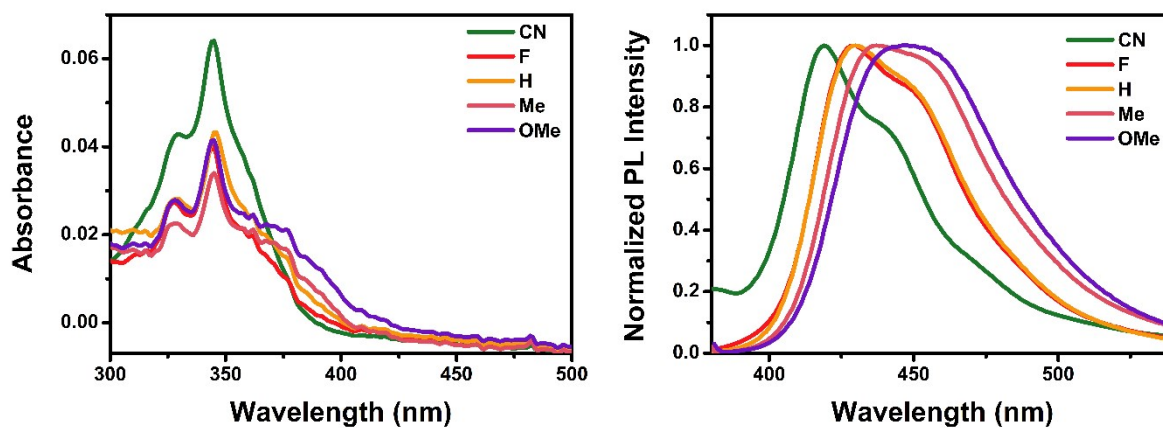

Figure S22. UV-vis absorption (left) and emission (right) spectra of **CN–OMe**, recorded at RT in PMMA film (1 wt. %).

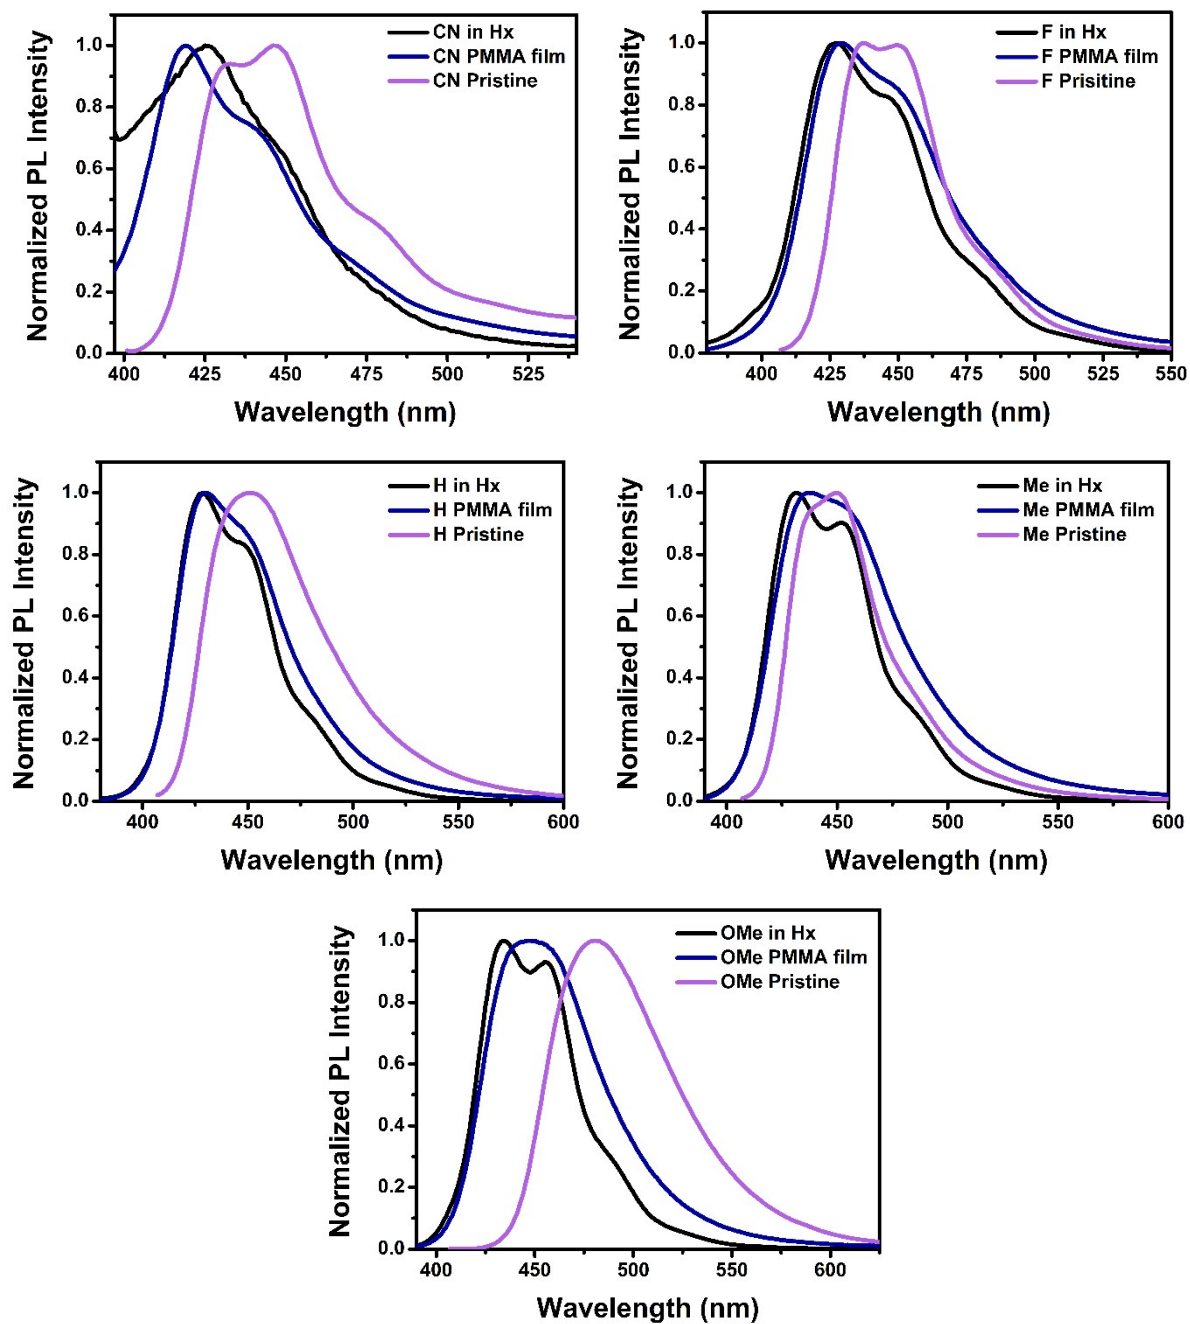

Figure S23. Comparison of emission spectra between solution and solid state for CN-OMe.

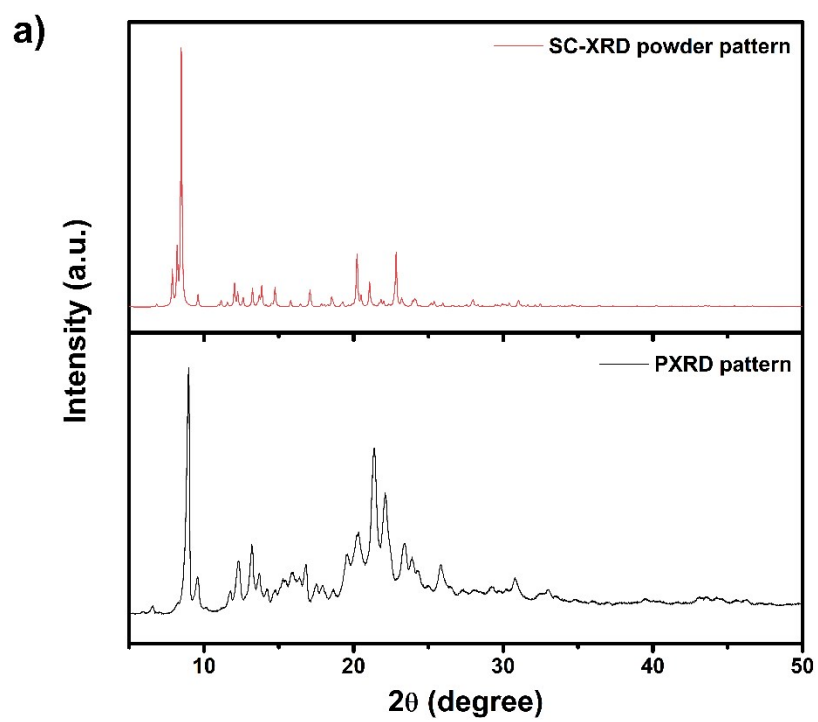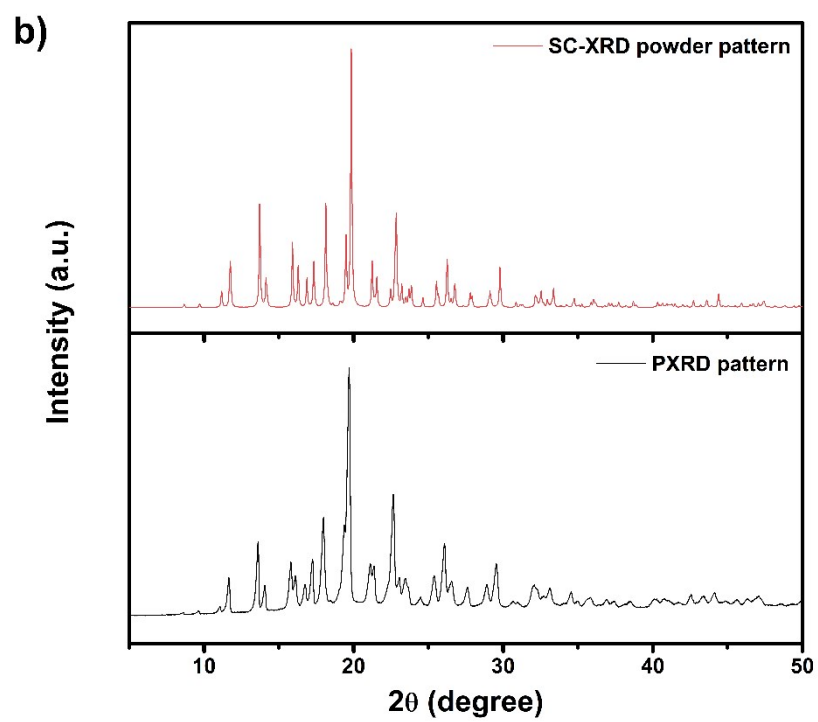

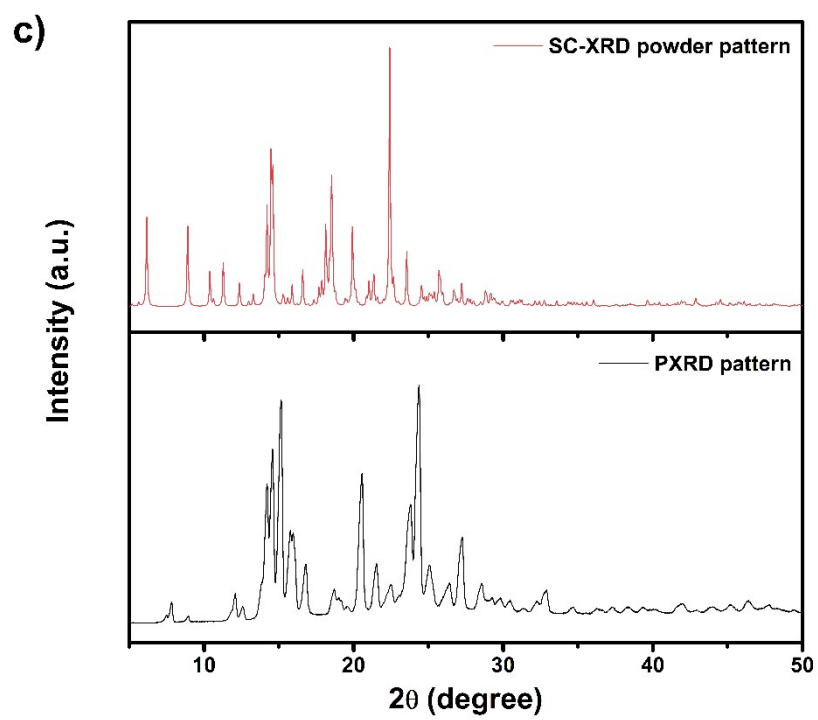

Figure S24. SC-XRD powder pattern (top) and PXRD pattern (bottom) of (a) **CN**, (b) **F**, and (c) **Me**.



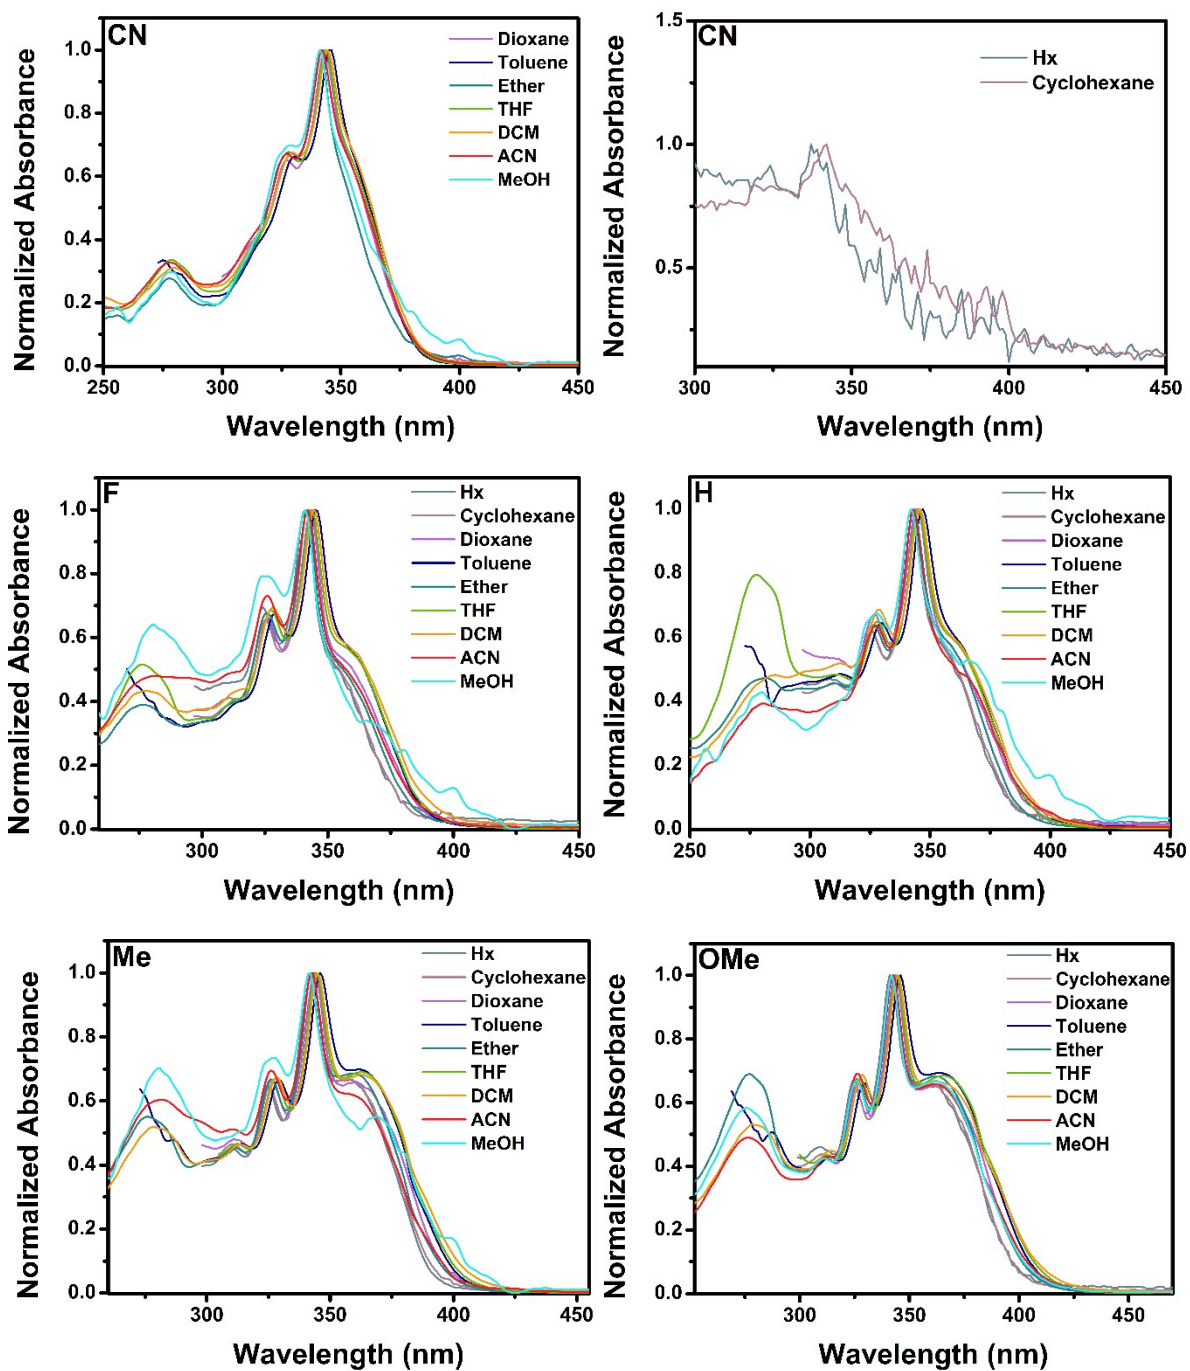

Figure S25. UV-vis absorption spectra of CN–OMe in various solvents at room temperature.

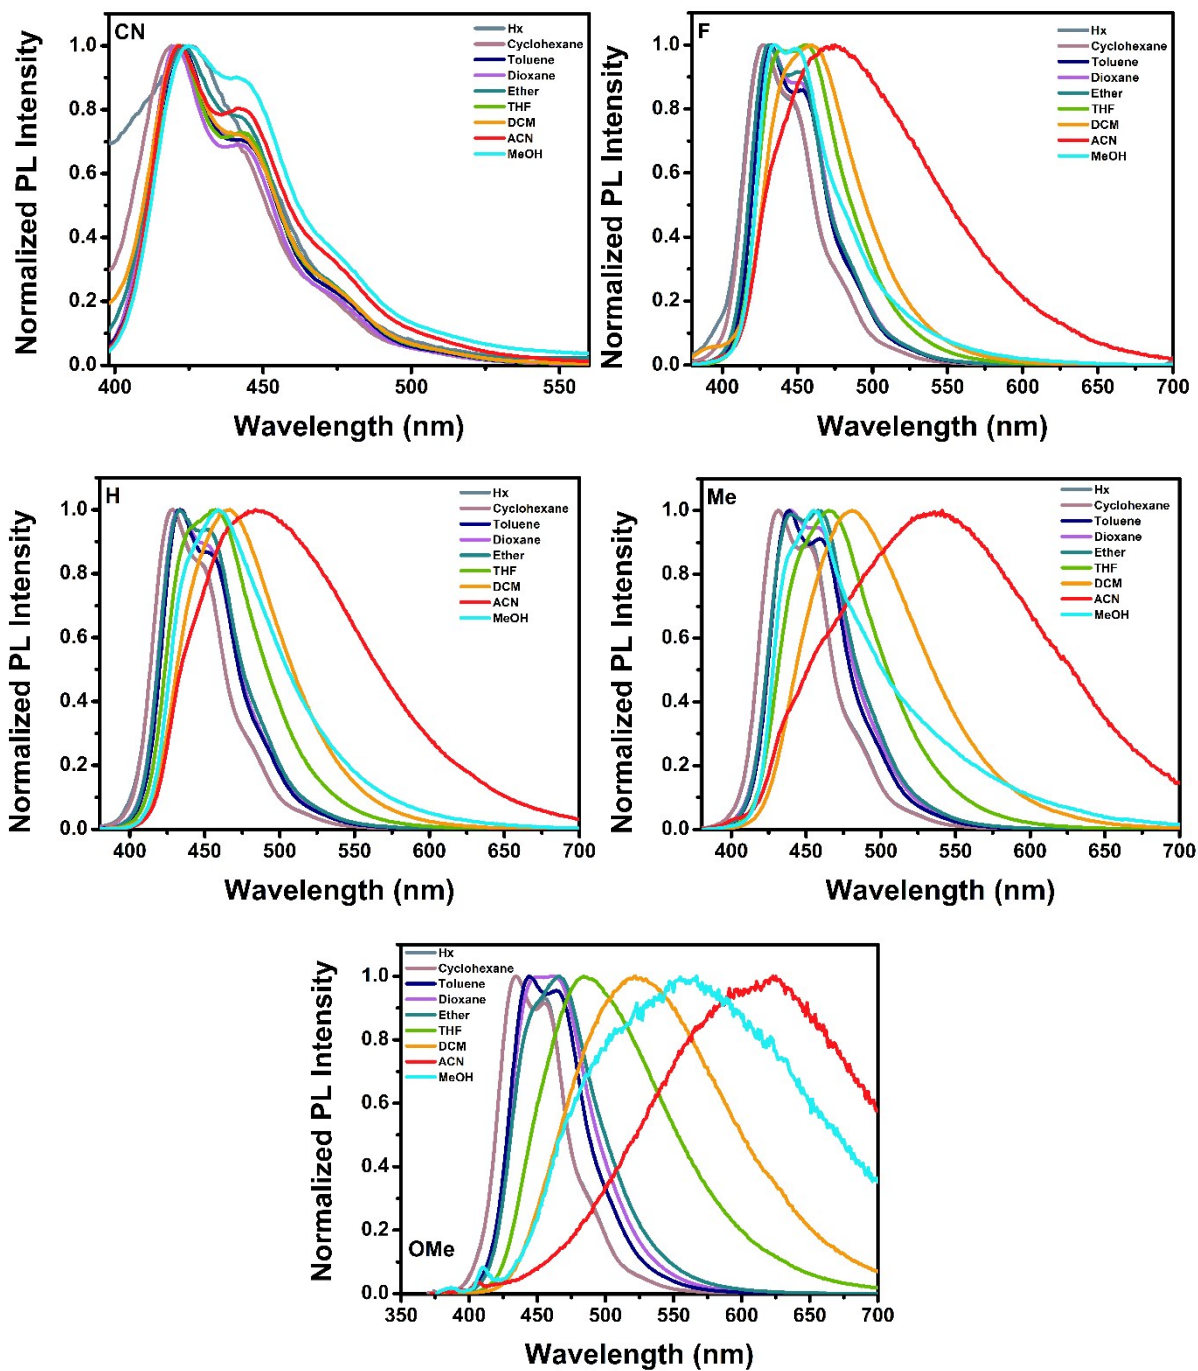

Figure S26. Emission spectra of CN-OMe in various solvents at room temperature.

Table S6. Spectroscopic parameters of **CN-OMe** in various solvents

| compounds | Solvents         | $\lambda_{\max}$ abs (nm) | $\lambda_{\max}$ em (nm) | Stokes shift (cm <sup>-1</sup> ) |
|-----------|------------------|---------------------------|--------------------------|----------------------------------|
| <b>CN</b> | <i>n</i> -Hexane | 350                       | 425                      | 5042                             |
|           | Cyclohexane      | 350                       | 419                      | 4705                             |
|           | Toluene          | 358                       | 422                      | 4236                             |
|           | 1,4-Dioxane      | 352                       | 421                      | 4656                             |
|           | Ether            | 352                       | 423                      | 4768                             |
|           | THF              | 356                       | 421                      | 4337                             |
|           | DCM              | 357                       | 421                      | 4258                             |
|           | ACN              | 356                       | 422                      | 4393                             |
|           | MeOH             | 352                       | 425                      | 4880                             |
| <b>F</b>  | <i>n</i> -Hexane | 355                       | 428                      | 4804                             |
|           | Cyclohexane      | 355                       | 427                      | 4750                             |
|           | Toluene          | 361                       | 432                      | 4553                             |
|           | 1,4-Dioxane      | 356                       | 432                      | 4942                             |
|           | Ether            | 357                       | 431                      | 4809                             |
|           | THF              | 360                       | 456                      | 5848                             |
|           | DCM              | 360                       | 460                      | 6039                             |
|           | ACN              | 359                       | 475                      | 6802                             |
|           | MeOH             | 353                       | 435                      | 5340                             |
| <b>H</b>  | <i>n</i> -Hexane | 358                       | 429                      | 4623                             |
|           | Cyclohexane      | 357                       | 428                      | 4647                             |
|           | Toluene          | 364                       | 433                      | 4378                             |
|           | 1,4-Dioxane      | 358                       | 433                      | 4838                             |
|           | Ether            | 360                       | 433                      | 4683                             |
|           | THF              | 363                       | 457                      | 5666                             |
|           | DCM              | 362                       | 467                      | 6211                             |
|           | ACN              | 366                       | 484                      | 6661                             |
|           | MeOH             | 367                       | 459                      | 5461                             |
| <b>Me</b> | <i>n</i> -Hexane | 359                       | 431                      | 4653                             |

|            |                  |     |     |       |
|------------|------------------|-----|-----|-------|
|            | Cyclohexane      | 359 | 431 | 4653  |
|            | Toluene          | 362 | 439 | 4845  |
|            | 1,4-Dioxane      | 360 | 440 | 5050  |
|            | Ether            | 359 | 458 | 6021  |
|            | THF              | 364 | 465 | 5967  |
|            | DCM              | 363 | 481 | 6758  |
|            | ACN              | 358 | 541 | 9449  |
|            | MeOH             | 369 | 455 | 5122  |
| <b>OMe</b> | <i>n</i> -Hexane | 360 | 434 | 4736  |
|            | Cyclohexane      | 360 | 434 | 4736  |
|            | Toluene          | 367 | 444 | 4725  |
|            | 1,4-Dioxane      | 363 | 462 | 5903  |
|            | Ether            | 362 | 466 | 6165  |
|            | THF              | 366 | 484 | 6661  |
|            | DCM              | 365 | 522 | 8240  |
|            | ACN              | 362 | 623 | 11573 |
|            | MeOH             | 362 | 567 | 9988  |

## Lippert-Mataga Calculation

The solvation effects that affect the optical properties of compounds can be understood using the Lippert-Mataga equation, a model that describes the interactions between the solvent and the dipole moment of the solute:

$$\Delta\nu = \bar{\nu}_a - \bar{\nu}_f = \frac{2}{hca_0^3} \left( \frac{\varepsilon - 1}{2\varepsilon + 1} + \frac{n^2 - 1}{2n^2 + 1} \right) \times (\mu_e - \mu_g)^2 + \text{constant}$$

$$= 2\Delta f \times \frac{\Delta\mu^2}{hca_0^3} + \text{constant}$$

where  $\Delta\nu$  is the Stokes shift;  $\bar{\nu}_a$  and  $\bar{\nu}_f$  are the absorption and emission energy in wavenumbers, respectively.  $\mu_e - \mu_g$  ( $\Delta\mu$ ) is the difference between the dipole moments of excited ( $\mu_e$ ) and ground ( $\mu_g$ ) states;  $c$  is the speed of light;  $h$  is Planck's constant, and  $a_0$  is the radius of the Onsager cavity around the fluorophore. The solvent dielectric constant ( $\varepsilon$ ) and refractive index ( $n$ ) are included in the term,  $\Delta f$ , which is known as the solvent polarity parameter. The Onsager radii were determined by *ab initio* calculation and were considered to be half of the average molecular sizes of **CN-OMe** (27.8, 26.0, 25.6, 27.7, and 28.6 Å, respectively). As shown in Table S7, the ground state dipole moments for the energy-minimized structures (obtained by DFT) were almost zero because of the symmetry of the compounds. The excited-state dipole moments were calculated using the values of the ground state dipole moment and dipole moment change.

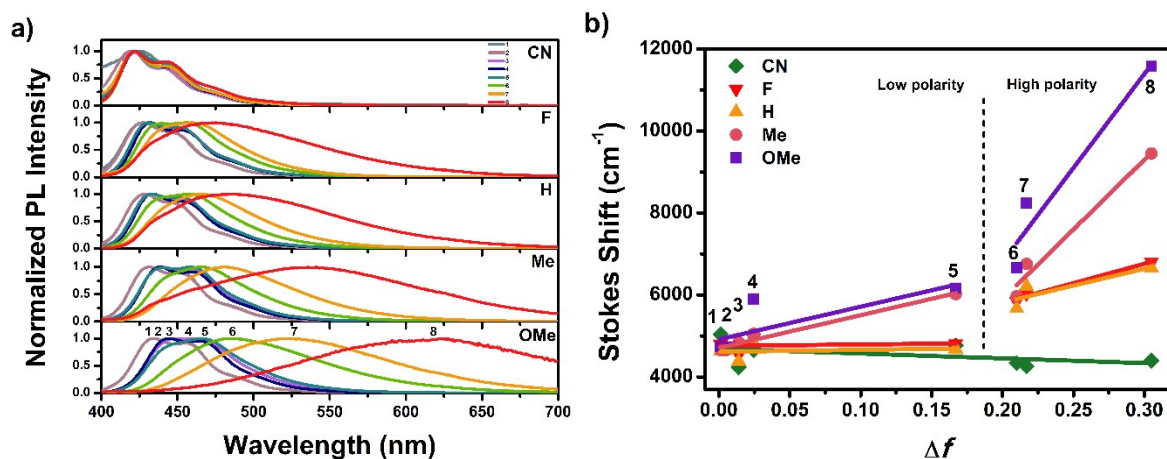

Figure S27 a) Emission spectra and b) Lippert-Mataga plots of **CN-OMe** in various solvents: 1, *n*-hexane; 2, cyclohexane; 3, toluene; 4, 1,4-dioxane; 5, ethyl ether; 6, THF; 7, CH<sub>2</sub>Cl<sub>2</sub>; 8, CH<sub>3</sub>CN.

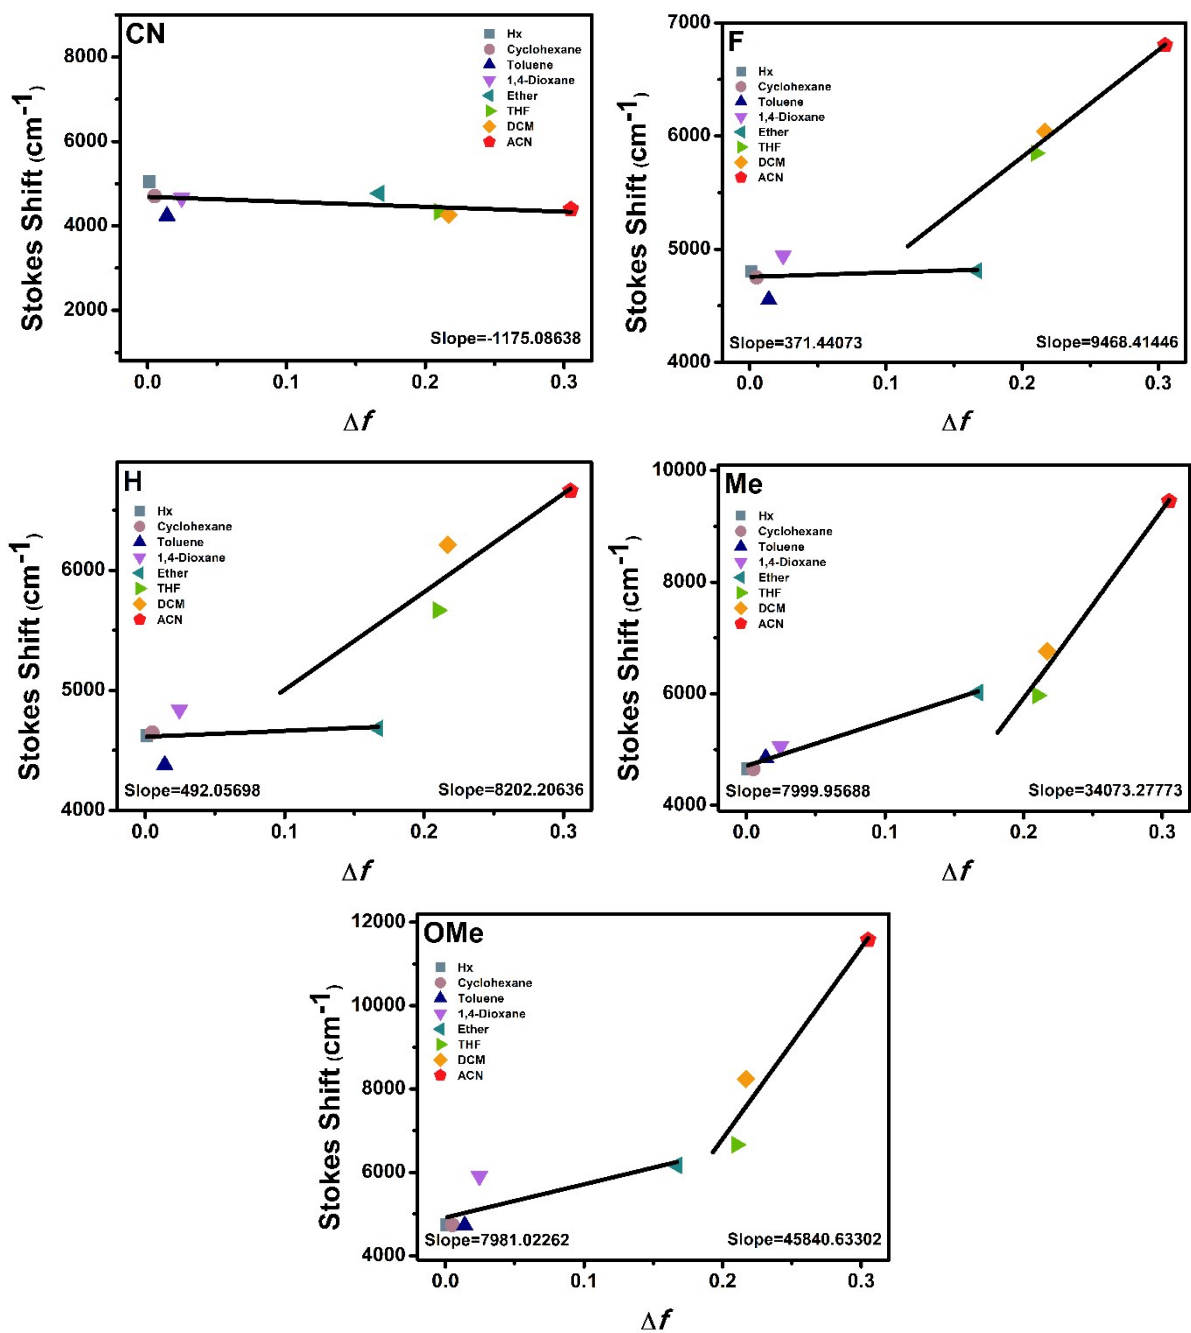

Figure S28. Lippert-Mataga plots for CN-OMe.

Table S7. Dipole moment values of **CN-OMe** in the ground and excited states

| Compounds  | $\Delta\mu$ |         | $\mu_g$  | $\mu_e$ |         |
|------------|-------------|---------|----------|---------|---------|
|            | low         | high    |          | low     | high    |
| <b>CN</b>  | 0.0 D       | 0.0 D   | 0.0004 D | 0.0 D   | 0.0 D   |
| <b>F</b>   | 9.0 D       | 45.5 D  | 0.0002 D | 9.0 D   | 45.5 D  |
| <b>H</b>   | 10.1 D      | 41.4 D  | 0.0 D    | 10.1 D  | 41.4 D  |
| <b>Me</b>  | 46.0 D      | 94.8 D  | 0.001 D  | 46.0 D  | 94.8 D  |
| <b>OMe</b> | 45.2 D      | 108.3 D | 0.0032 D | 45.2 D  | 108.3 D |

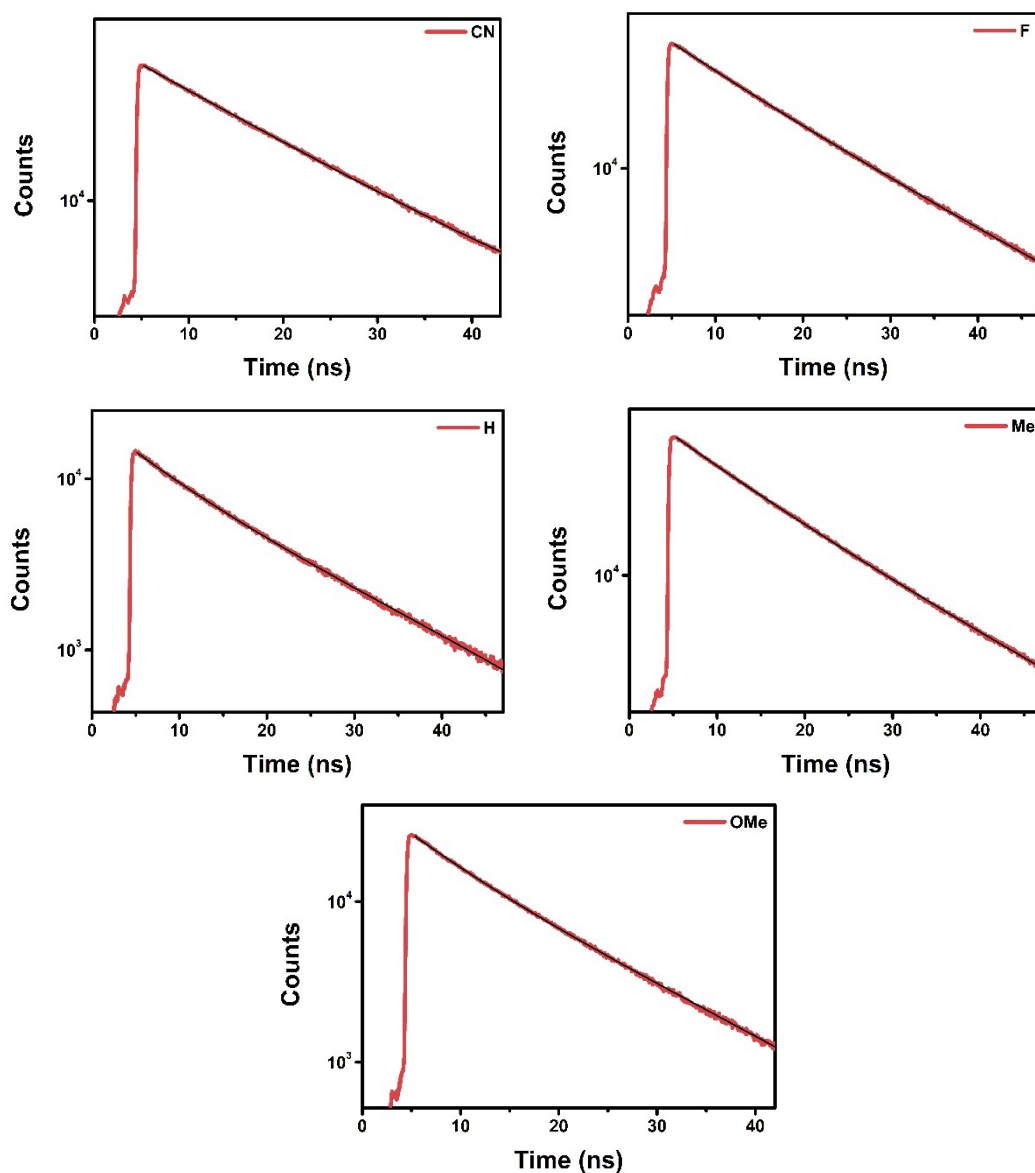

Figure S29. Fluorescence lifetimes ( $\tau_F$ ) of **CN-OMe** in toluene solution at RT.

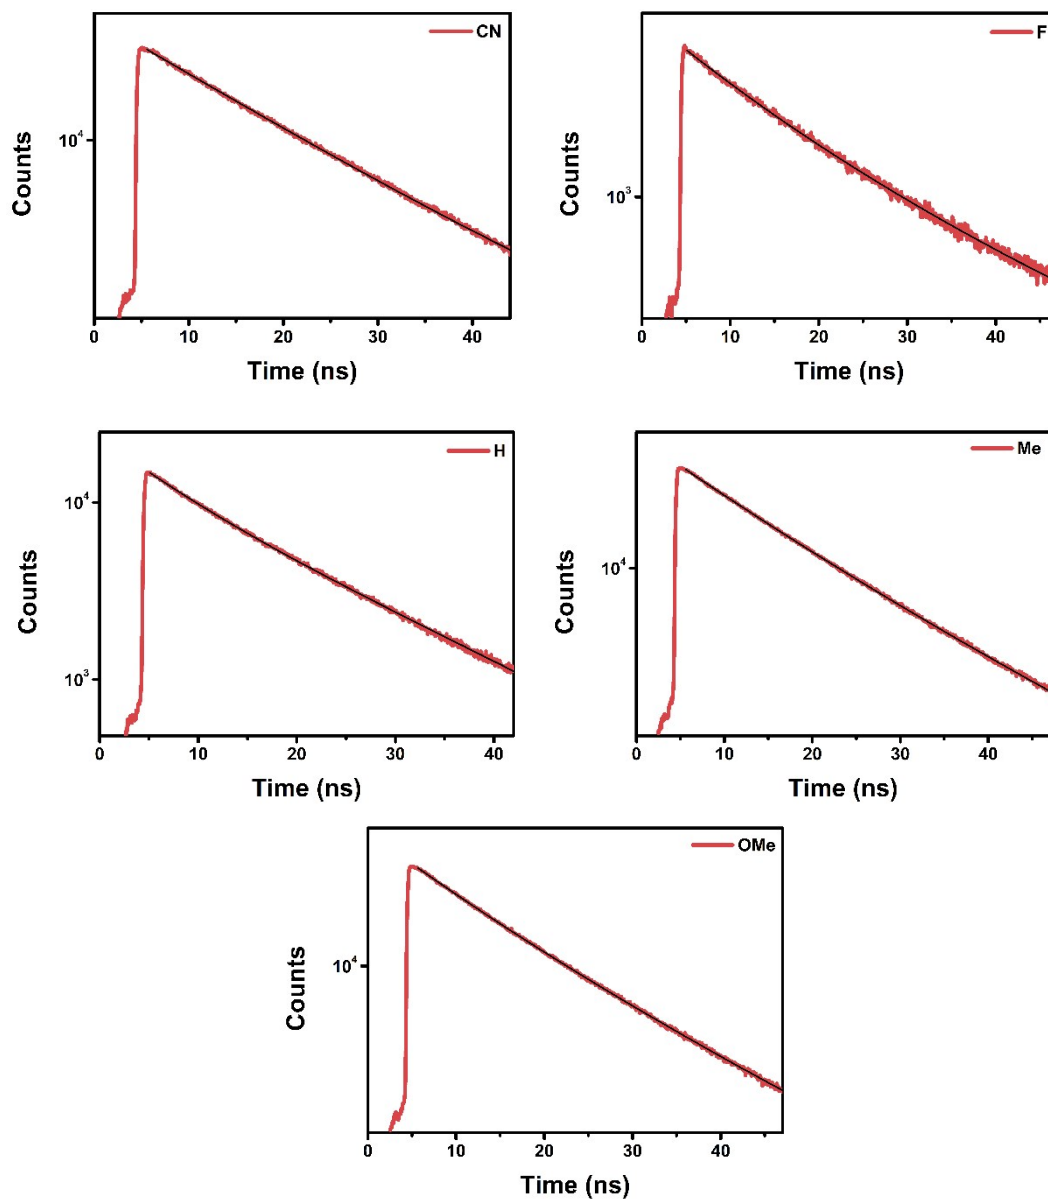

Figure S30. Fluorescence lifetimes ( $\tau_F$ ) of CN-OMe in dichloromethane solution at RT.



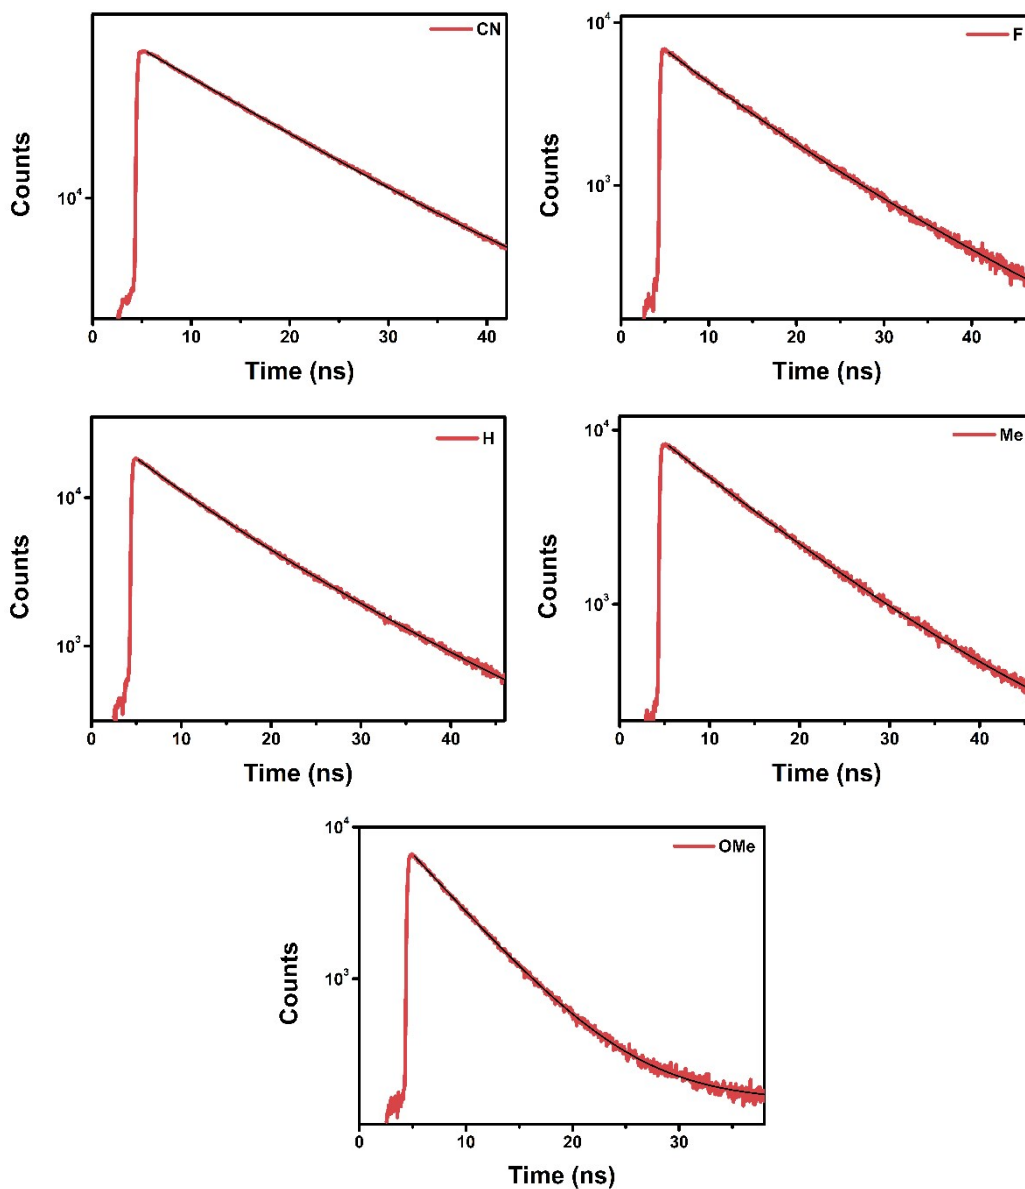

Figure S31. Fluorescence lifetimes ( $\tau_F$ ) of CN–OMe in acetonitrile solution at RT.

Table S8. Fluorescence lifetimes ( $\tau_F$ ) measured in toluene, dichloromethane, and acetonitrile.

| Compounds | $\tau_F$ (ns) | $\tau_F$ (ns) | $\tau_F$ (ns) |
|-----------|---------------|---------------|---------------|
|           | in toluene    | in DCM        | in ACN        |
| CN        | 17.4          | 20.3          | 14.4          |
| F         | 9.9, 17.4     | 8.8, 19.6     | 7.3, 14.3     |
| H         | 7.2, 17.7     | 7.2, 17.8     | 6.5, 13.0     |
| Me        | 8.8, 15.7     | 9.2, 15.6     | 9.2, 14.1     |

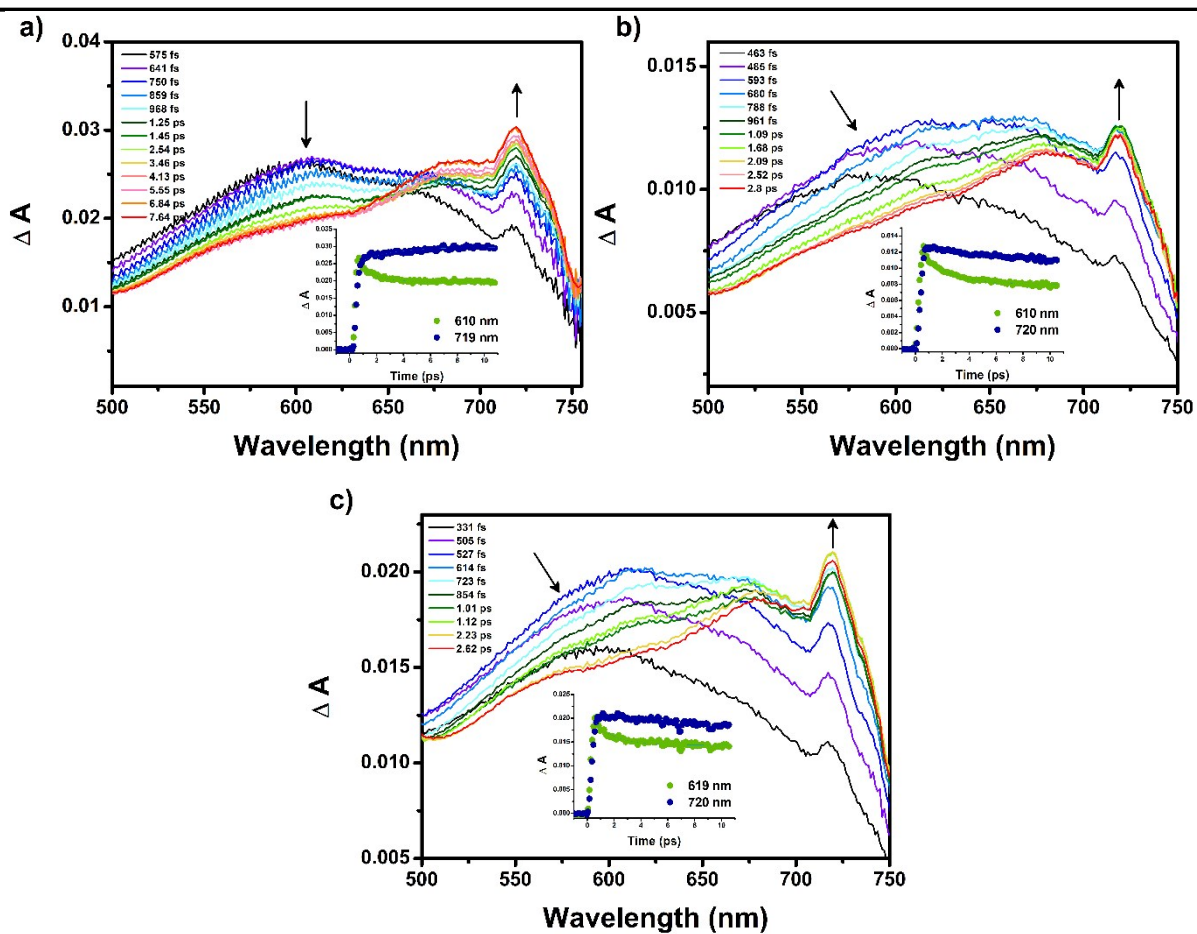

Figure S32. Chirping corrected transient absorption spectra of a) **F**, b) **H** and c) **Me** in  $\text{CH}_2\text{Cl}_2$ . The excitation wavelength was 340 nm. Inset: decay and rise profiles were monitored at selected wavelengths.

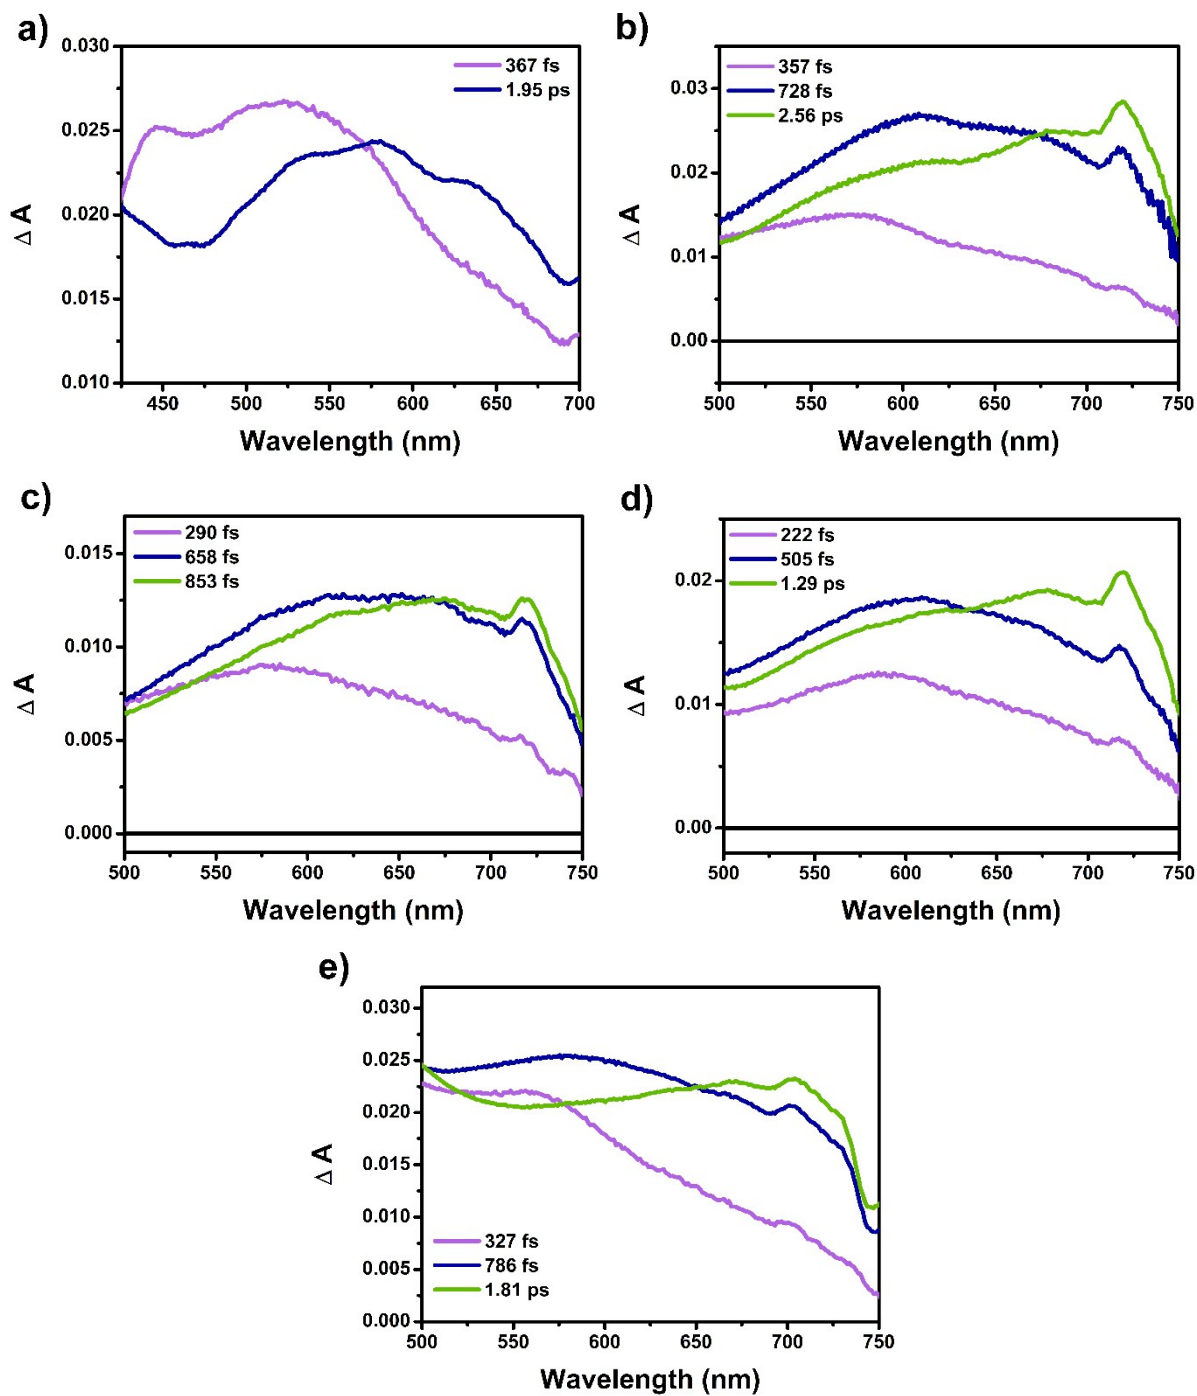

Figure S33. Chirping corrected transient absorption spectra of (a) **CN**, (b) **F**, (c) **H**, (d) **Me**, and (e) **OMe** in  $\text{CH}_2\text{Cl}_2$ . The excitation wavelength was 340 nm.

## DFT/TD-DFT Calculation Details

All the calculations were performed on the platform of the Gaussian 16 package.<sup>4</sup> The ground-state geometry of all compounds has been optimized at the density function theory (DFT) level. Full geometry optimizations in their ground state were performed using the B3LYP functional<sup>5-8</sup> and the 6-31G<sup>9, 10</sup> basis set for all atoms. No charge and no symmetry constraints were applied during the geometry optimizations. The nature of the stationary points located was further checked by computations of harmonic vibrational frequencies at the same level of theory. As well as, all of the Cartesian coordinates for optimized structure of all compounds are also summarized in Table S10–S14. The Isodensity plots (isodensity contour = 0.04 a.u.) of the selected frontier orbitals (HOMO-3, HOMO-2, HOMO-1, HOMO, LUMO, LUMO+1, LUMO+2, LUMO+3) were visualized by Chem3D Ultra and GaussView 5.0 program (Figure S35–S39). The excitation energies and oscillator strengths for the lowest 100 singlet–singlet transitions at the optimized geometry in the ground state were obtained in TD-DFT calculations using the same basis set and functional as for the ground state. The simulated absorption spectra were obtained by the GaussSum program based on TD-DFT results (Figure S40–S44). To reduce the meaningless features, only 20 singlet–singlet transitions are summarized in Table S15–S19.

Table S9. The number of imaginary frequencies, total energies, and dipole moments for the compound **CN–OMe** as obtained in the geometry optimizations at B3LYP/6-31G method

| Entry      | Number of imaginary frequencies | Total energies (Eh)<br>(Hartrees) | Ground state dipole moment<br>(field-independent basis, Debye) |
|------------|---------------------------------|-----------------------------------|----------------------------------------------------------------|
| <b>CN</b>  | 0                               | -2481.81332514                    | 0.0004                                                         |
| <b>F</b>   | 0                               | -2509.76571817                    | 0.0002                                                         |
| <b>H</b>   | 0                               | -2112.84272399                    | 0.0000                                                         |
| <b>Me</b>  | 0                               | -2270.12422887                    | 0.0010                                                         |
| <b>OMe</b> | 0                               | -2570.93885996                    | 0.0032                                                         |

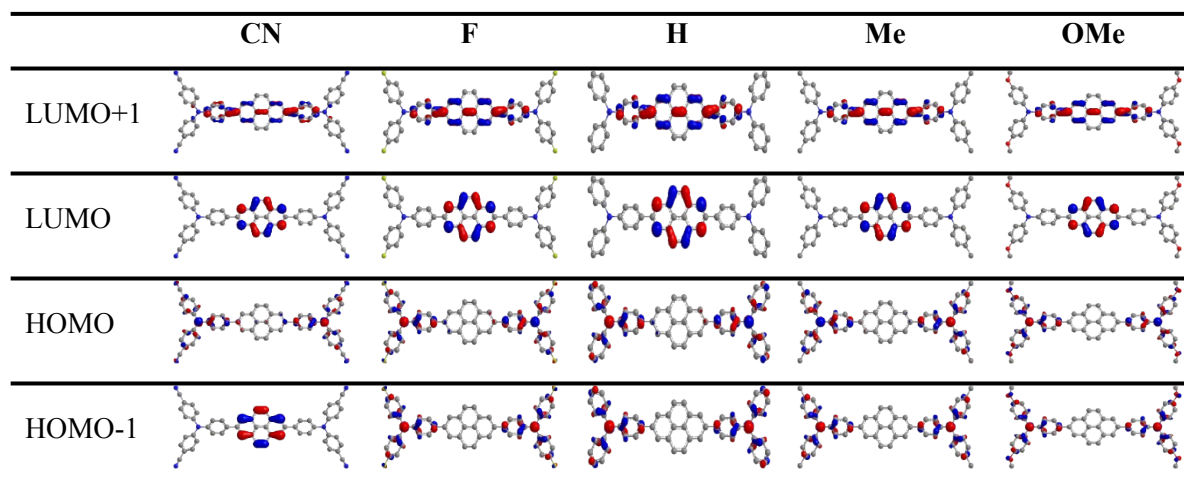

Figure S34. Frontier orbital distributions (HOMO-1, HOMO, LUMO, LUMO+1) of **CN-OMe** calculated by DFT with the B3LYP function and the 6-31G (d,p) basis.

Table S10. Cartesian coordinates for optimized structure for CN

Symbolic Z-matrix:

Charge = 0 Multiplicity = 1

| Atom | X          | Y         | Z         | Atom | X          | Y         | Z         |
|------|------------|-----------|-----------|------|------------|-----------|-----------|
| C    | -1.429336  | 1.23326   | 0.003713  | C    | 10.146432  | -3.32454  | -1.426084 |
| C    | -2.830304  | 1.207586  | 0.003652  | C    | 9.480071   | -2.131299 | -1.186324 |
| C    | -3.544904  | -0.000024 | -0.000003 | C    | 11.172663  | 1.510991  | -0.432744 |
| C    | -2.830311  | -1.207637 | -0.003662 | C    | 11.845618  | 2.69881   | -0.184487 |
| C    | -1.429342  | -1.233319 | -0.003729 | C    | 11.3399    | 3.622645  | 0.746548  |
| C    | -0.711748  | -0.000032 | -0.000009 | C    | 10.146171  | 3.324548  | 1.42609   |
| C    | 0.711695   | -0.000035 | -0.00001  | C    | 9.479903   | 2.131258  | 1.186314  |
| C    | 1.429298   | -1.233308 | 0.005303  | C    | 12.029626  | 4.851575  | 0.997424  |
| C    | 2.830261   | -1.207633 | 0.005197  | N    | 12.589618  | 5.851281  | 1.201601  |
| C    | 3.544907   | -0.000043 | -0.000009 | C    | 12.029991  | -4.851429 | -0.997373 |
| C    | 2.830268   | 1.20755   | -0.005217 | N    | 12.59006   | -5.851093 | -1.201539 |
| C    | 1.429304   | 1.233232  | -0.005324 | C    | -12.029937 | -4.851569 | 0.996665  |
| C    | 0.680616   | 2.461932  | -0.003011 | N    | -12.590006 | -5.851264 | 1.200686  |
| C    | -0.680628  | 2.461942  | -0.000191 | C    | -12.029736 | 4.851644  | -0.99668  |
| C    | 0.680601   | -2.462003 | 0.002988  | N    | -12.589761 | 5.851363  | -1.200704 |
| C    | -0.680642  | -2.462005 | 0.000171  | H    | -3.370272  | 2.149762  | -0.023273 |
| C    | 5.029111   | -0.000043 | -0.000007 | H    | -3.370285  | -2.14981  | 0.023263  |
| C    | -5.029116  | -0.000022 | 0         | H    | 3.370159   | -2.149876 | -0.020631 |
| C    | 5.756806   | -0.954642 | 0.731305  | H    | 3.370172   | 2.149789  | 0.020609  |
| C    | 7.14774    | -0.954106 | 0.740324  | H    | 1.228892   | 3.40011   | -0.004577 |
| C    | 7.858586   | -0.000035 | -0.000008 | H    | -1.228893  | 3.400128  | 0.00016   |
| C    | 7.147734   | 0.954037  | -0.740331 | H    | 1.228872   | -3.400185 | 0.00455   |
| C    | 5.756799   | 0.954563  | -0.731314 | H    | -1.228912  | -3.400188 | -0.000183 |
| C    | -5.756761  | 0.954578  | 0.731337  | H    | 5.225704   | -1.684821 | 1.333846  |
| C    | -7.147699  | 0.954038  | 0.740363  | H    | 7.689204   | -1.686666 | 1.329938  |
| C    | -7.858536  | -0.000022 | 0.000003  | H    | 7.689194   | 1.686606  | -1.329938 |
| C    | -7.147702  | -0.954079 | -0.740361 | H    | 5.225692   | 1.684742  | -1.333851 |
| C    | -5.756762  | -0.95462  | -0.731335 | H    | -5.225587  | 1.684783  | 1.33379   |
| N    | 9.28822    | -0.000019 | -0.000004 | H    | -7.689177  | 1.686573  | 1.329997  |
| C    | 9.982293   | 1.206085  | 0.25314   | H    | -7.689178  | -1.686613 | -1.329997 |
| C    | 9.982367   | -1.206083 | -0.253136 | H    | -5.22559   | -1.684826 | -1.333789 |
| N    | -9.288171  | -0.000014 | 0.000002  | H    | -11.562672 | 0.815157  | 1.167111  |
| C    | -9.982316  | -1.20612  | 0.252958  | H    | -12.759059 | 2.926429  | 0.723821  |
| C    | -9.982276  | 1.206113  | -0.252956 | H    | -9.753576  | 4.028236  | -2.151897 |
| C    | -11.172611 | 1.510908  | 0.433036  | H    | -8.56663   | 1.905734  | -1.724316 |
| C    | -11.845609 | 2.698741  | 0.184962  | H    | -11.562684 | -0.815101 | -1.16712  |
| C    | -11.339967 | 3.622699  | -0.745994 | H    | -12.75916  | -2.926325 | -0.723844 |
| C    | -10.146275 | 3.32471   | -1.425647 | H    | -9.753759  | -4.028251 | 2.151912  |
| C    | -9.479967  | 2.131405  | -1.186054 | H    | -8.566724  | -1.9058   | 1.724344  |
| C    | -11.172657 | -1.510868 | -0.433042 | H    | 11.562809  | -0.815218 | 1.166905  |
| C    | -11.845707 | -2.698674 | -0.184975 | H    | 12.75928   | -2.926373 | 0.723321  |
| C    | -11.340114 | -3.622653 | 0.745985  | H    | 9.753739   | -4.028001 | -2.152401 |
| C    | -10.146419 | -3.324711 | 1.425654  | H    | 8.566708   | -1.905617 | -1.72453  |
| C    | -9.480059  | -2.131434 | 1.186067  | H    | 11.562784  | 0.815342  | -1.166883 |
| C    | 11.172749  | -1.510901 | 0.432764  | H    | 12.759095  | 2.926582  | -0.723265 |
| C    | 11.845796  | -2.698672 | 0.184526  | H    | 9.753407   | 4.027979  | 2.152398  |
| C    | 11.340166  | -3.62255  | -0.746514 | H    | 8.566538   | 1.905505  | 1.724494  |

Table S11. Cartesian coordinates for optimized structure for **F**

Symbolic Z-matrix:

Charge = 0 Multiplicity = 1

| Atom | X          | Y         | Z         | Atom | X          | Y         | Z         |
|------|------------|-----------|-----------|------|------------|-----------|-----------|
| C    | 1.430267   | -1.232711 | 0.003998  | C    | -11.835153 | 2.609707  | 0.801338  |
| C    | 2.831175   | -1.206747 | 0.002287  | C    | -11.423802 | 3.626033  | -0.052866 |
| C    | 3.548371   | 0.000003  | 0.000001  | C    | -10.323894 | 3.474734  | -0.889354 |
| C    | 2.831176   | 1.206753  | -0.002284 | C    | -9.625688  | 2.269563  | -0.8763   |
| C    | 1.430268   | 1.232718  | -0.003994 | C    | -11.117969 | -1.415731 | -0.825191 |
| C    | 0.711696   | 0.000004  | 0.000002  | C    | -11.835127 | -2.609727 | -0.801341 |
| C    | -0.711677  | 0.000004  | 0.000002  | C    | -11.423765 | -3.626049 | 0.052863  |
| C    | -1.430252  | 1.232713  | 0.004593  | C    | -10.323858 | -3.474739 | 0.889351  |
| C    | -2.831159  | 1.20675   | 0.002868  | C    | -9.625665  | -2.26956  | 0.876297  |
| C    | -3.548367  | 0.000005  | 0.000002  | F    | -12.110027 | 4.78925   | -0.071246 |
| C    | -2.83116   | -1.20674  | -0.002863 | F    | -12.109978 | -4.789273 | 0.071242  |
| C    | -1.430253  | -1.232704 | -0.004589 | F    | 12.109995  | -4.789266 | -0.070895 |
| C    | -0.680692  | -2.461069 | -0.001826 | F    | 12.110007  | 4.78926   | 0.070891  |
| C    | 0.680703   | -2.461072 | 0.000643  | H    | 3.370916   | -2.149063 | -0.02646  |
| C    | -0.680691  | 2.461078  | 0.001831  | H    | 3.370917   | 2.149069  | 0.026463  |
| C    | 0.680704   | 2.461079  | -0.000638 | H    | -3.37088   | 2.149088  | -0.025469 |
| C    | -5.031527  | 0.000005  | 0.000002  | H    | -3.370881  | -2.149079 | 0.025473  |
| C    | 5.031532   | 0.000002  | 0.000001  | H    | -1.229092  | -3.399366 | -0.00283  |
| C    | -5.76335   | 0.964696  | 0.713404  | H    | 1.2291     | -3.399369 | 0.001196  |
| C    | -7.153395  | 0.964991  | 0.723665  | H    | -1.22909   | 3.399374  | 0.002836  |
| C    | -7.873834  | 0.000005  | 0.000001  | H    | 1.229102   | 3.399377  | -0.001192 |
| C    | -7.153394  | -0.964981 | -0.723662 | H    | -5.234619  | 1.705316  | 1.305895  |
| C    | -5.763349  | -0.964686 | -0.7134   | H    | -7.689272  | 1.708054  | 1.304316  |
| C    | 5.763342   | -0.964648 | 0.713465  | H    | -7.689272  | -1.708045 | -1.304312 |
| C    | 7.153389   | -0.964939 | 0.723728  | H    | -5.234619  | -1.705307 | -1.30589  |
| C    | 7.873824   | 0.000001  | 0         | H    | 5.234592   | -1.705249 | 1.305963  |
| C    | 7.153389   | 0.964942  | -0.723729 | H    | 7.689271   | -1.707961 | 1.304428  |
| C    | 5.763343   | 0.964652  | -0.713464 | H    | 7.689271   | 1.707964  | -1.304428 |
| N    | -9.291106  | 0.000002  | 0         | H    | 5.234593   | 1.705254  | -1.305962 |
| C    | -10.008987 | -1.228383 | 0.015365  | H    | 11.418582  | -0.618942 | 1.497     |
| C    | -10.008998 | 1.228381  | -0.015367 | H    | 12.693919  | -2.764477 | 1.445479  |
| N    | 9.291098   | 0         | -0.000001 | H    | 10.036101  | -4.285952 | -1.548968 |
| C    | 10.008987  | 1.228382  | 0.015275  | H    | 8.774571   | -2.131611 | -1.534038 |
| C    | 10.008984  | -1.228383 | -0.015277 | H    | 11.418583  | 0.618938  | -1.497003 |
| C    | 11.117959  | -1.415669 | 0.825303  | H    | 12.693926  | 2.764469  | -1.445482 |
| C    | 11.835123  | -2.609663 | 0.80154   | H    | 10.036113  | 4.285951  | 1.548966  |
| C    | 11.423776  | -3.626045 | -0.0526   | H    | 8.774577   | 2.131613  | 1.534037  |
| C    | 10.323876  | -3.474796 | -0.889109 | H    | -11.418609 | 0.619035  | 1.496936  |
| C    | 9.625677   | -2.26962  | -0.876143 | H    | -12.693957 | 2.764559  | 1.445257  |
| C    | 11.117962  | 1.415665  | -0.825305 | H    | -10.036116 | 4.285847  | -1.549265 |
| C    | 11.835129  | 2.609658  | -0.801543 | H    | -8.774575  | 2.131514  | -1.534177 |
| C    | 11.423785  | 3.62604   | 0.052597  | H    | -11.418603 | -0.61905  | -1.496939 |
| C    | 10.323886  | 3.474795  | 0.889107  | H    | -12.693929 | -2.764588 | -1.445261 |
| C    | 9.625683   | 2.26962   | 0.876142  | H    | -10.036072 | -4.285849 | 1.549261  |
| C    | -11.117983 | 1.415718  | 0.825188  | H    | -8.774553  | -2.131502 | 1.534174  |

Table S12. Cartesian coordinates for optimized structure for **H**

Symbolic Z-matrix:

Charge = 0 Multiplicity = 1

| Atom | X          | Y         | Z         | Atom | X          | Y         | Z         |
|------|------------|-----------|-----------|------|------------|-----------|-----------|
| C    | 1.430377   | -1.232658 | 0.004261  | C    | -11.838739 | 2.631675  | 0.695166  |
| C    | 2.831295   | -1.206663 | 0.002479  | C    | -11.421397 | 3.65659   | -0.156201 |
| C    | 3.548708   | -0.000001 | -0.00001  | C    | -10.29319  | 3.462255  | -0.955549 |
| C    | 2.831295   | 1.206662  | -0.002502 | C    | -9.593795  | 2.257913  | -0.914439 |
| C    | 1.430378   | 1.232658  | -0.004288 | C    | -11.135277 | -1.430595 | -0.757101 |
| C    | 0.711692   | 0         | -0.000014 | C    | -11.838736 | -2.631681 | -0.695141 |
| C    | -0.711692  | 0         | -0.000014 | C    | -11.421386 | -3.656595 | 0.156223  |
| C    | -1.430377  | 1.232658  | 0.004267  | C    | -10.293174 | -3.462257 | 0.955563  |
| C    | -2.831294  | 1.206664  | 0.002485  | C    | -9.593783  | -2.257913 | 0.914449  |
| C    | -3.548708  | 0.000001  | -0.00001  | H    | 3.371128   | -2.148928 | -0.026065 |
| C    | -2.831295  | -1.206662 | -0.002507 | H    | 3.371129   | 2.148927  | 0.026044  |
| C    | -1.430378  | -1.232657 | -0.004294 | H    | -3.371128  | 2.148929  | -0.026055 |
| C    | -0.680711  | -2.460972 | -0.001242 | H    | -3.371129  | -2.148927 | 0.026034  |
| C    | 0.68071    | -2.460973 | 0.001201  | H    | -1.229161  | -3.399266 | -0.002027 |
| C    | -0.68071   | 2.460973  | 0.001212  | H    | 1.22916    | -3.399266 | 0.001978  |
| C    | 0.680711   | 2.460973  | -0.001231 | H    | -1.22916   | 3.399267  | 0.001995  |
| C    | -5.031918  | 0.000001  | -0.000006 | H    | 1.229161   | 3.399266  | -0.002011 |
| C    | 5.031918   | -0.000001 | -0.000006 | H    | -5.234409  | 1.706406  | 1.304703  |
| C    | -5.763413  | 0.965477  | 0.712789  | H    | -7.690558  | 1.709163  | 1.301626  |
| C    | -7.153463  | 0.965487  | 0.722884  | H    | -7.690565  | -1.70916  | -1.301624 |
| C    | -7.87353   | 0.000001  | 0.000001  | H    | -5.234416  | -1.706403 | -1.304714 |
| C    | -7.153467  | -0.965484 | -0.722885 | H    | 5.234409   | -1.706404 | 1.304705  |
| C    | -5.763417  | -0.965475 | -0.712798 | H    | 7.690558   | -1.709161 | 1.301628  |
| C    | 5.763413   | -0.965476 | 0.71279   | H    | 7.690565   | 1.709159  | -1.301626 |
| C    | 7.153463   | -0.965486 | 0.722885  | H    | 5.234416   | 1.706402  | -1.304716 |
| C    | 7.87353    | -0.000001 | 0.000001  | H    | 11.455497  | -0.642184 | 1.429896  |
| C    | 7.153467   | 0.965484  | -0.722886 | H    | 12.710539  | -2.770481 | 1.328178  |
| C    | 5.763416   | 0.965475  | -0.712799 | H    | 11.967954  | -4.593678 | -0.196439 |
| N    | -9.291493  | 0.000001  | 0.000005  | H    | 9.960909   | -4.247292 | -1.628845 |
| C    | -10.005573 | -1.229261 | 0.05195   | H    | 8.726361   | -2.106392 | -1.547979 |
| C    | -10.005576 | 1.229261  | -0.051936 | H    | 11.455505  | 0.642187  | -1.429873 |
| N    | 9.291493   | 0         | 0.000005  | H    | 12.710542  | 2.770486  | -1.328148 |
| C    | 10.005573  | 1.229261  | 0.051949  | H    | 11.967944  | 4.593682  | 0.196464  |
| C    | 10.005576  | -1.229261 | -0.051935 | H    | 9.960891   | 4.247293  | 1.628857  |
| C    | 11.135275  | -1.430591 | 0.757123  | H    | 8.726347   | 2.10639   | 1.547985  |
| C    | 11.838738  | -2.631675 | 0.695169  | H    | -11.455497 | 0.642185  | 1.429895  |
| C    | 11.421395  | -3.656591 | -0.156197 | H    | -12.71054  | 2.770481  | 1.328175  |
| C    | 10.293188  | -3.462257 | -0.955544 | H    | -11.967956 | 4.593677  | -0.196444 |
| C    | 9.593794   | -2.257914 | -0.914436 | H    | -9.960911  | 4.24729   | -1.62885  |
| C    | 11.135277  | 1.430594  | -0.757103 | H    | -8.726362  | 2.10639   | -1.547982 |
| C    | 11.838737  | 2.631679  | -0.695144 | H    | -11.455505 | -0.642189 | -1.429872 |
| C    | 11.421387  | 3.656594  | 0.156219  | H    | -12.710541 | -2.770489 | -1.328144 |
| C    | 10.293176  | 3.462258  | 0.955559  | H    | -11.967941 | -4.593683 | 0.196469  |
| C    | 9.593784   | 2.257914  | 0.914447  | H    | -9.960888  | -4.247291 | 1.628862  |
| C    | -11.135276 | 1.430592  | 0.757122  | H    | -8.726345  | -2.106388 | 1.547986  |



Table S13. Cartesian coordinates for optimized structure for Me

Symbolic Z-matrix:

Charge = 0 Multiplicity = 1

| Atom | X          | Y         | Z         | Atom | X          | Y         | Z         |
|------|------------|-----------|-----------|------|------------|-----------|-----------|
| C    | 1.43055    | -1.232571 | 0.00426   | C    | -11.447683 | -3.672746 | 0.054922  |
| C    | 2.831451   | -1.206533 | 0.002228  | C    | -10.322415 | -3.479451 | 0.866882  |
| C    | 3.549293   | 0.000008  | 0.000043  | C    | -9.617836  | -2.278306 | 0.862501  |
| C    | 2.831451   | 1.206549  | -0.002147 | C    | -12.232024 | 4.962545  | -0.096782 |
| C    | 1.43055    | 1.232587  | -0.004188 | C    | -12.23196  | -4.962578 | 0.096751  |
| C    | 0.711694   | 0.000008  | 0.000033  | C    | 12.231893  | -4.962629 | -0.096817 |
| C    | -0.711652  | 0.000008  | 0.000027  | C    | 12.231932  | 4.962619  | 0.096649  |
| C    | -1.430511  | 1.232584  | 0.004341  | H    | 3.371228   | -2.14883  | -0.026722 |
| C    | -2.831411  | 1.206546  | 0.00229   | H    | 3.371228   | 2.148846  | 0.026807  |
| C    | -3.549262  | 0.000008  | 0.000013  | H    | -3.371176  | 2.14885   | -0.026625 |
| C    | -2.831411  | -1.206531 | -0.002257 | H    | -3.371176  | -2.148835 | 0.026652  |
| C    | -1.43051   | -1.232569 | -0.004293 | H    | -1.229153  | -3.399148 | -0.002105 |
| C    | -0.680705  | -2.460823 | -0.001283 | H    | 1.22919    | -3.39915  | 0.001903  |
| C    | 0.680744   | -2.460824 | 0.001153  | H    | -1.229153  | 3.399164  | 0.002157  |
| C    | -0.680706  | 2.460838  | 0.001338  | H    | 1.22919    | 3.399166  | -0.00183  |
| C    | 0.680743   | 2.460839  | -0.001087 | H    | -5.235848  | 1.710516  | 1.299113  |
| C    | -5.032243  | 0.000007  | 0.000005  | H    | -7.690655  | 1.713829  | 1.295839  |
| C    | 5.032276   | 0.000008  | 0.000047  | H    | -7.690639  | -1.713818 | -1.295858 |
| C    | -5.764468  | 0.967556  | 0.709292  | H    | -5.235832  | -1.710504 | -1.299105 |
| C    | -7.154347  | 0.967994  | 0.719307  | H    | 5.235846   | -1.710265 | 1.299466  |
| C    | -7.875876  | 0.000006  | -0.000012 | H    | 7.690675   | -1.713554 | 1.296243  |
| C    | -7.154338  | -0.967982 | -0.719322 | H    | 7.690681   | 1.713572  | -1.296136 |
| C    | -5.764459  | -0.967542 | -0.70929  | H    | 5.235852   | 1.710281  | -1.29937  |
| C    | 5.764485   | -0.967408 | 0.709529  | H    | 11.437829  | -0.616506 | 1.47395   |
| C    | 7.154365   | -0.967839 | 0.719559  | H    | 12.695239  | -2.736366 | 1.43116   |
| C    | 7.875895   | 0.000008  | 0.000053  | H    | 9.996357   | -4.279278 | -1.527455 |
| C    | 7.154368   | 0.967856  | -0.719455 | H    | 8.756533   | -2.149781 | -1.509674 |
| C    | 5.764488   | 0.967424  | -0.70943  | H    | 11.437982  | 0.616311  | -1.473724 |
| N    | -9.291862  | 0.000002  | -0.000021 | H    | 12.695421  | 2.736155  | -1.431044 |
| C    | -10.009639 | -1.228755 | 0.018054  | H    | 9.996271   | 4.279444  | 1.527128  |
| C    | -10.009654 | 1.228749  | -0.018091 | H    | 8.756427   | 2.149974  | 1.509476  |
| N    | 9.291883   | 0.000005  | 0.000006  | H    | -11.437771 | 0.616434  | 1.473954  |
| C    | 10.009663  | 1.228756  | 0.018075  | H    | -12.69526  | 2.736251  | 1.431206  |
| C    | 10.009645  | -1.228764 | -0.018059 | H    | -9.996523  | 4.279268  | -1.527485 |
| C    | 11.127857  | -1.415294 | 0.808401  | H    | -8.756625  | 2.149817  | -1.50975  |
| C    | 11.833736  | -2.615085 | 0.778848  | H    | -11.437741 | -0.616474 | -1.47402  |
| C    | 11.447632  | -3.672788 | -0.054975 | H    | -12.695203 | -2.736309 | -1.431268 |
| C    | 10.322334  | -3.479474 | -0.86688  | H    | -9.996488  | -4.279257 | 1.52748   |
| C    | 9.617779   | -2.27831  | -0.862475 | H    | -8.756618  | -2.149789 | 1.50974   |
| C    | 11.127951  | 1.415174  | -0.808293 | H    | -12.702742 | 5.176204  | 0.867773  |
| C    | 11.833849  | 2.614966  | -0.778808 | H    | -11.592845 | 5.812139  | -0.355439 |
| C    | 11.447687  | 3.672766  | 0.054845  | H    | -13.033359 | 4.920064  | -0.845577 |
| C    | 10.322301  | 3.479561  | 0.866673  | H    | -12.702592 | -5.176296 | -0.867832 |
| C    | 9.617733   | 2.278417  | 0.862339  | H    | -11.592789 | -5.812149 | 0.355507  |
| C    | -11.127845 | 1.415236  | 0.8084    | H    | -13.03336  | -4.92007  | 0.845475  |
| C    | -11.83377  | 2.615005  | 0.778873  | H    | 12.701835  | -5.176796 | 0.868007  |
| C    | -11.447731 | 3.672722  | -0.054953 | H    | 11.592876  | -5.812058 | -0.356408 |
| C    | -10.322449 | 3.479451  | -0.8669   | H    | 13.033836  | -4.919809 | -0.844942 |
| C    | -9.617853  | 2.278316  | -0.862521 | H    | 12.703791  | 5.175557  | -0.867503 |
| C    | -11.127815 | -1.415266 | -0.808452 | H    | 11.592449  | 5.812413  | 0.353916  |
| C    | -11.833724 | -2.615043 | -0.778923 | H    | 13.032366  | 4.920702  | 0.84644   |

Table S14. Cartesian coordinates for optimized structure for **OMe**

Symbolic Z-matrix:

Charge = 0 Multiplicity = 1

| Atom | X          | Y         | Z         | Atom | X          | Y         | Z         |
|------|------------|-----------|-----------|------|------------|-----------|-----------|
| C    | 2.831564   | -1.206312 | 0.001209  | C    | -9.678886  | 2.298024  | -0.78369  |
| C    | 1.43071    | -1.232417 | 0.003814  | O    | -12.238512 | 4.762543  | 0.259753  |
| C    | 0.711577   | 0.000002  | 0.000032  | O    | -12.238546 | -4.762528 | -0.259793 |
| C    | 1.430708   | 1.232422  | -0.003744 | O    | 12.238613  | -4.762364 | 0.260123  |
| C    | 2.831562   | 1.206319  | -0.00113  | O    | 12.238739  | 4.762292  | -0.260219 |
| C    | 3.550225   | 0.000004  | 0.000043  | C    | 11.925928  | 5.876862  | 0.558567  |
| C    | -0.711703  | 0.000001  | 0.000025  | C    | 11.925892  | -5.876828 | -0.558842 |
| C    | -1.430835  | -1.232415 | -0.004402 | C    | -11.925485 | -5.877126 | 0.55886   |
| C    | -2.831685  | -1.206314 | -0.001788 | C    | -11.925393 | 5.877158  | -0.558854 |
| C    | -3.550358  | -0.000001 | 0.000009  | H    | 3.371052   | -2.148752 | -0.028858 |
| C    | -2.831686  | 1.206314  | 0.001816  | H    | 3.371049   | 2.14876   | 0.028939  |
| C    | -1.430837  | 1.232416  | 0.004445  | H    | -3.37117   | -2.148773 | 0.027723  |
| C    | 0.680679   | -2.460592 | 0.000467  | H    | -3.371173  | 2.148772  | -0.027699 |
| C    | -0.680803  | -2.460591 | -0.001709 | H    | 1.22911    | -3.398975 | 0.00089   |
| C    | 0.680675   | 2.460596  | -0.000402 | H    | -1.229236  | -3.398973 | -0.002663 |
| C    | -0.680807  | 2.460594  | 0.001761  | H    | 1.229105   | 3.39898   | -0.000818 |
| C    | 5.0328     | 0.000006  | 0.000047  | H    | -1.229241  | 3.398975  | 0.002711  |
| C    | -5.032925  | -0.000002 | 0.000002  | H    | -5.23887   | 1.72001   | 1.286104  |
| C    | -5.766629  | 0.972343  | 0.701293  | H    | -7.690744  | 1.724944  | 1.282134  |
| C    | -7.156214  | 0.973974  | 0.710899  | H    | -7.690727  | -1.724949 | -1.282164 |
| C    | -7.880464  | -0.000004 | -0.000013 | H    | -5.238853  | -1.72001  | -1.286108 |
| C    | -7.156205  | -0.97398  | -0.710921 | H    | 5.238735   | -1.72063  | 1.28531   |
| C    | -5.766619  | -0.972346 | -0.701299 | H    | 7.690589   | -1.725615 | 1.281305  |
| C    | 5.766493   | -0.97269  | 0.700846  | H    | 7.690591   | 1.72564   | -1.281189 |
| C    | 7.156082   | -0.97434  | 0.710455  | H    | 5.238737   | 1.720645  | -1.285209 |
| C    | 7.880346   | 0.000011  | 0.000057  | H    | 11.379271  | -0.55676  | 1.581054  |
| C    | 7.156084   | 0.974361  | -0.710344 | H    | 12.665672  | -2.684333 | 1.641695  |
| C    | 5.766495   | 0.972705  | -0.700745 | H    | 10.09207   | -4.310581 | -1.392796 |
| N    | -9.292866  | -0.000002 | -0.00002  | H    | 8.848649   | -2.193881 | -1.474311 |
| C    | -10.018048 | -1.225758 | -0.048738 | H    | 11.379486  | 0.556543  | -1.580743 |
| C    | -10.01804  | 1.225758  | 0.048701  | H    | 12.665933  | 2.684076  | -1.641477 |
| N    | 9.29274    | 0.000009  | 0.000063  | H    | 10.091971  | 4.310752  | 1.392478  |
| C    | 10.017982  | 1.225726  | -0.048805 | H    | 8.848503   | 2.194091  | 1.4741    |
| C    | 10.017957  | -1.225734 | 0.04886   | H    | -11.379971 | -0.556655 | -1.580348 |
| C    | 11.103618  | -1.378678 | 0.928641  | H    | -12.666231 | -2.684291 | -1.640858 |
| C    | 11.825827  | -2.562746 | 0.965595  | H    | -10.091408 | -4.31085  | 1.392426  |
| C    | 11.470787  | -3.637877 | 0.137924  | H    | -8.848127  | -2.194089 | 1.47385   |
| C    | 10.386422  | -3.500906 | -0.73578  | H    | -11.380029 | 0.556632  | 1.580243  |
| C    | 9.679225   | -2.297861 | -0.783879 | H    | -12.666271 | 2.684277  | 1.640753  |
| C    | 11.103761  | 1.378543  | -0.928464 | H    | -10.091314 | 4.310886  | -1.39239  |
| C    | 11.825998  | 2.562593  | -0.96547  | H    | -8.848049  | 2.194117  | -1.473817 |
| C    | 11.470875  | 3.637835  | -0.13798  | H    | 12.648975  | 6.652536  | 0.302053  |
| C    | 10.386393  | 3.500991  | 0.735599  | H    | 10.912269  | 6.251477  | 0.365107  |
| C    | 9.679166   | 2.297967  | 0.783757  | H    | 12.019545  | 5.636301  | 1.625581  |
| C    | -11.104019 | -1.378645 | -0.928154 | H    | 12.648895  | -6.652544 | -0.30233  |
| C    | -11.826153 | -2.56276  | -0.965036 | H    | 10.912203  | -6.251452 | -0.365559 |
| C    | -11.470743 | -3.638008 | -0.137676 | H    | 12.019651  | -5.636135 | -1.625813 |
| C    | -10.386068 | -3.501094 | 0.73565   | H    | -12.648542 | -6.652831 | 0.302467  |
| C    | -9.678937  | -2.298006 | 0.783693  | H    | -10.911848 | -6.25167  | 0.365153  |
| C    | -11.104043 | 1.378634  | 0.928078  | H    | -12.018878 | -5.63663  | 1.625908  |
| C    | -11.826168 | 2.562755  | 0.96496   | H    | -12.648446 | 6.652872  | -0.302469 |
| C    | -11.470716 | 3.638019  | 0.137641  | H    | -10.911756 | 6.251676  | -0.365093 |
| C    | -10.386007 | 3.501117  | -0.735645 | H    | -12.018746 | 5.636697  | -1.625914 |

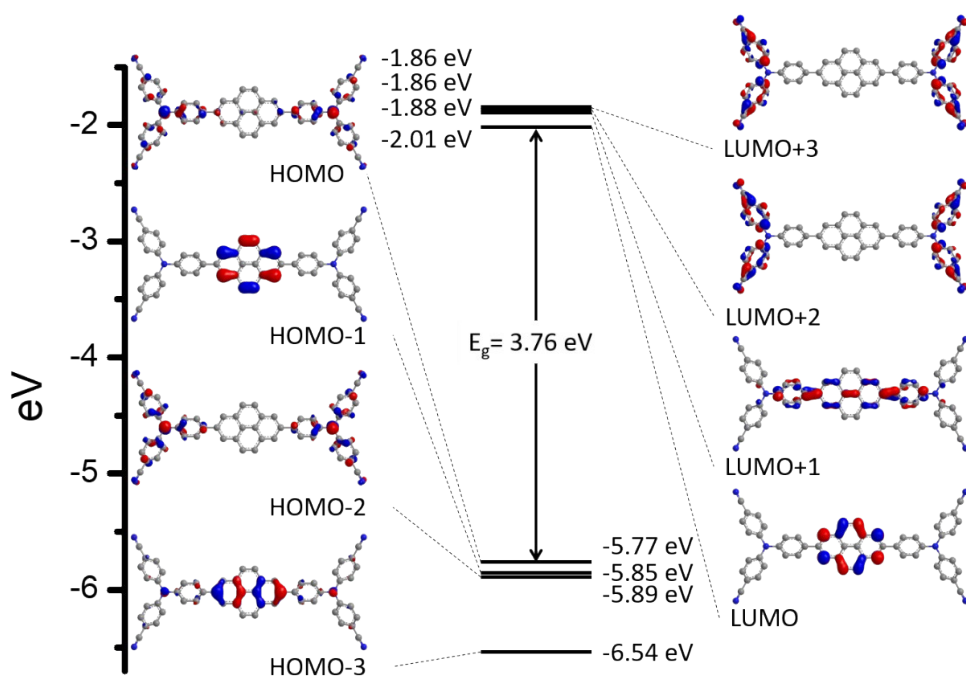

Figure S35. Energy levels and isodensity plots (isodensity contour = 0.04 a.u.) for selected occupied and unoccupied molecular orbitals of CN obtained by DFT calculations.

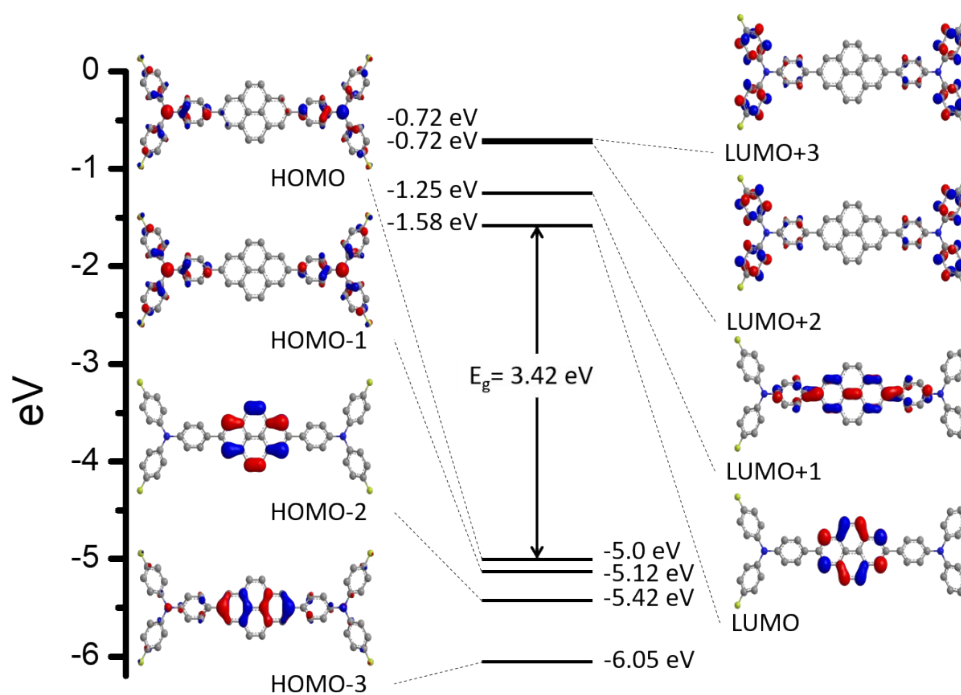

Figure S36. Energy levels and isodensity plots (isodensity contour = 0.04 a.u.) for selected occupied and unoccupied molecular orbitals of F obtained by DFT calculations.

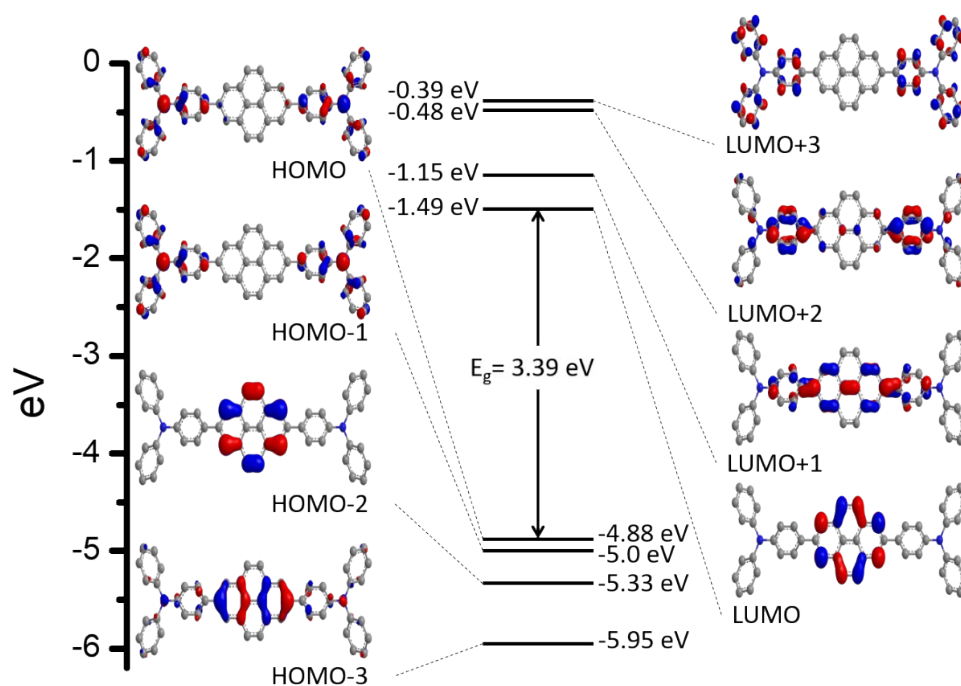

Figure S37. Energy levels and isodensity plots (isodensity contour = 0.04 a.u.) for selected occupied and unoccupied molecular orbitals of **H** obtained by DFT calculations.

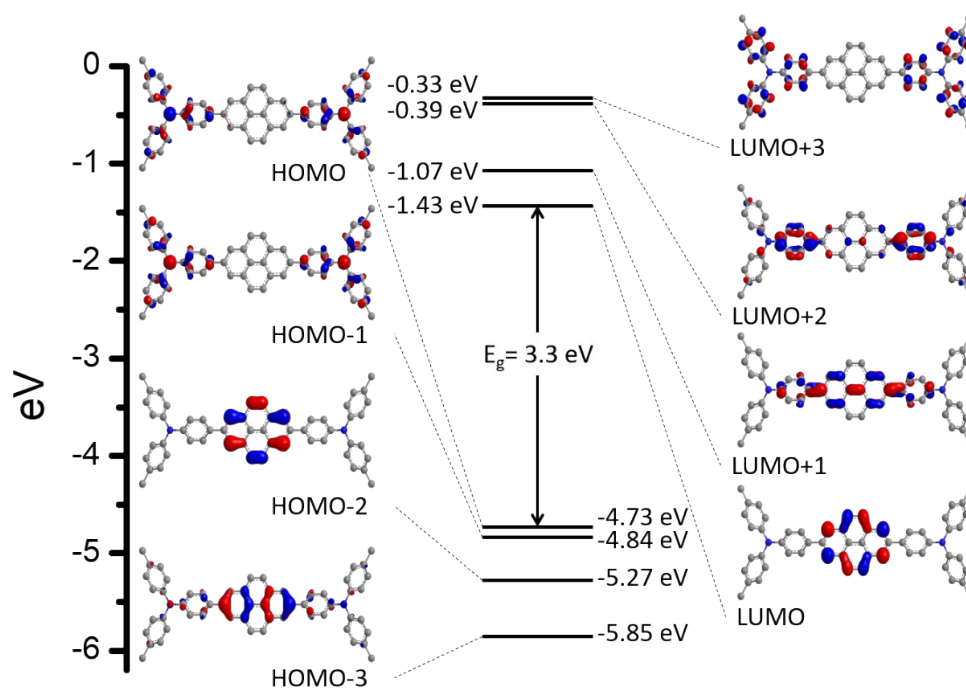

Figure S38. Energy levels and isodensity plots (isodensity contour = 0.04 a.u.) for selected occupied and unoccupied molecular orbitals of **Me** obtained by DFT calculations.

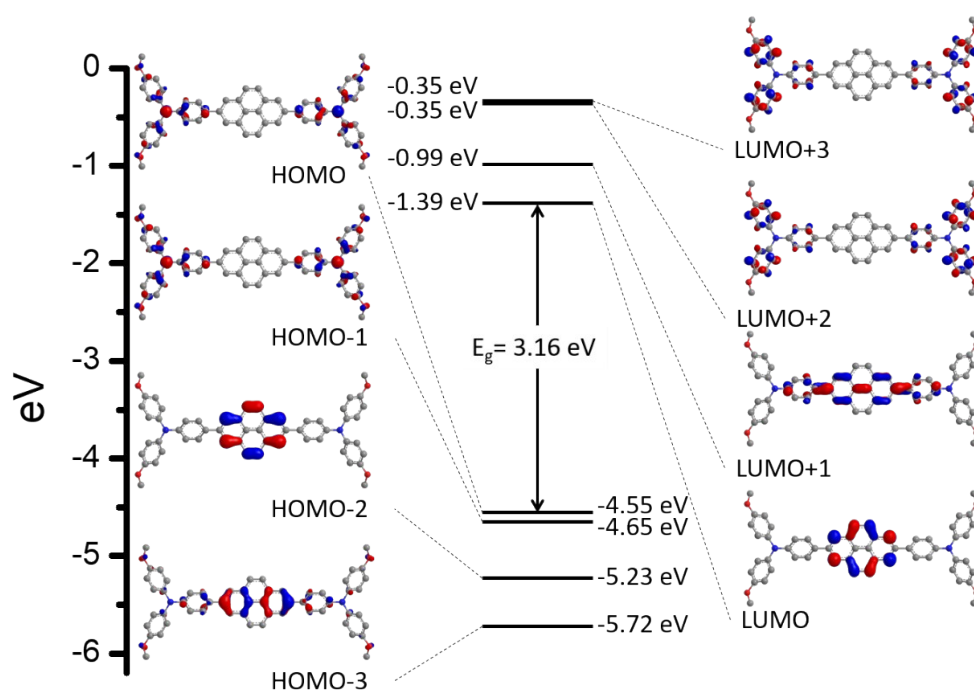

Figure S39. Energy levels and isodensity plots (isodensity contour = 0.04 a.u.) for selected occupied and unoccupied molecular orbitals of **OMe** obtained by DFT calculations.

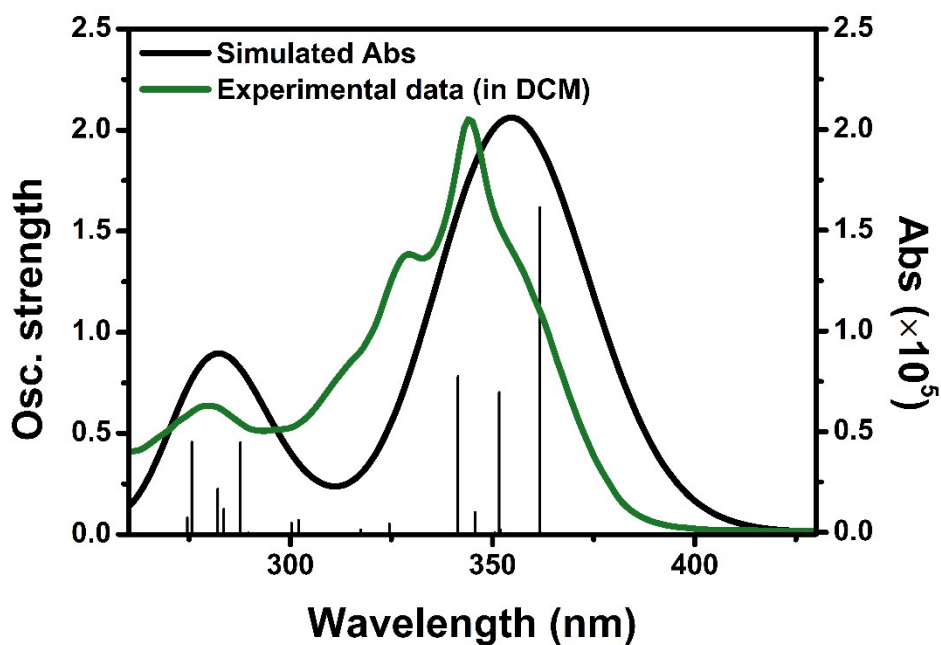

Figure S40. Electronic transition and simulated absorption spectra of **CN** in the ground state geometry obtained by TD-DFT calculations.

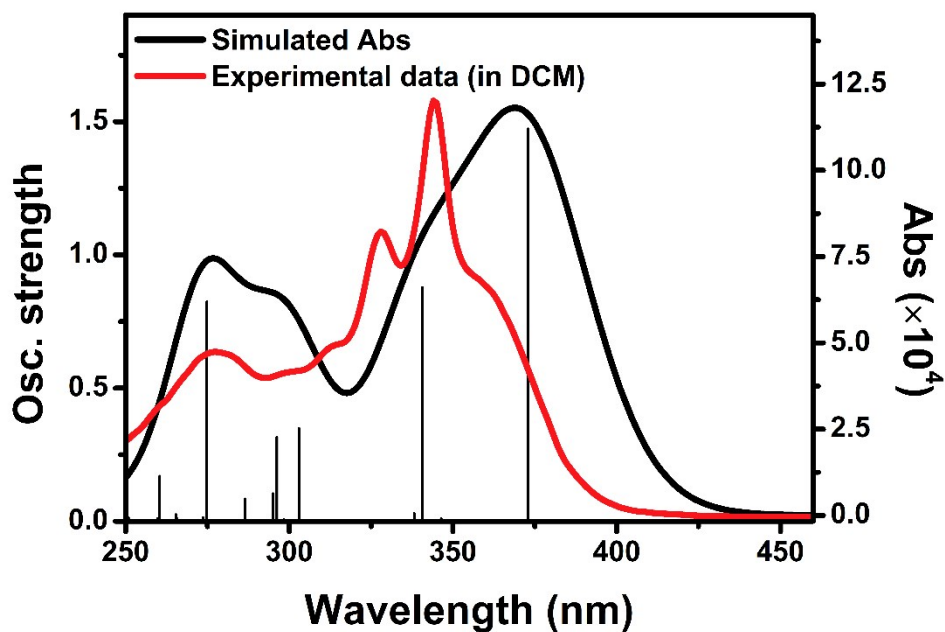

Figure S41. Electronic transition and simulated absorption spectra of **F** in the ground state geometry obtained by TD-DFT calculations.

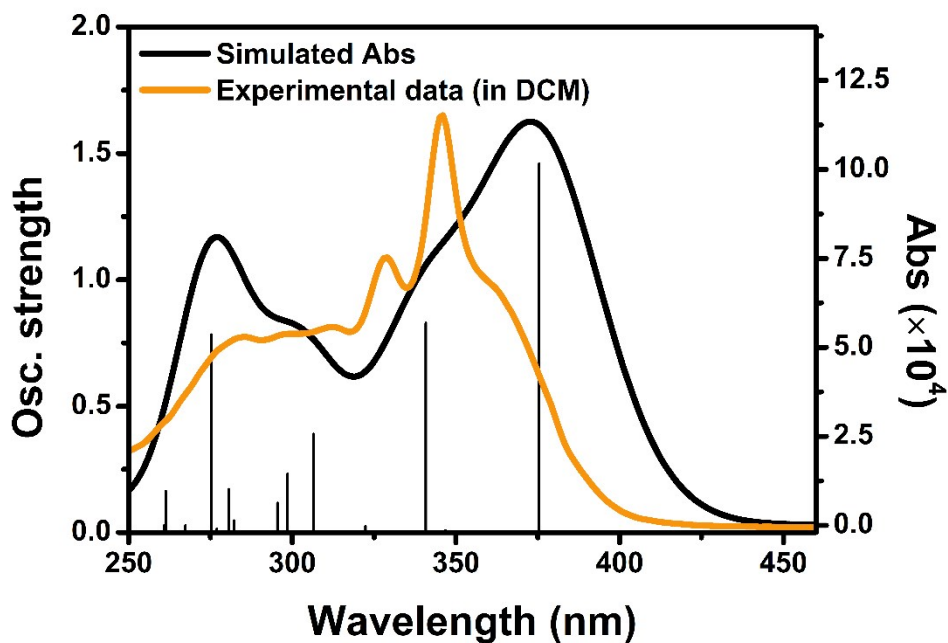

Figure S42. Electronic transition and simulated absorption spectra of **H** in the ground state geometry obtained by TD-DFT calculations.

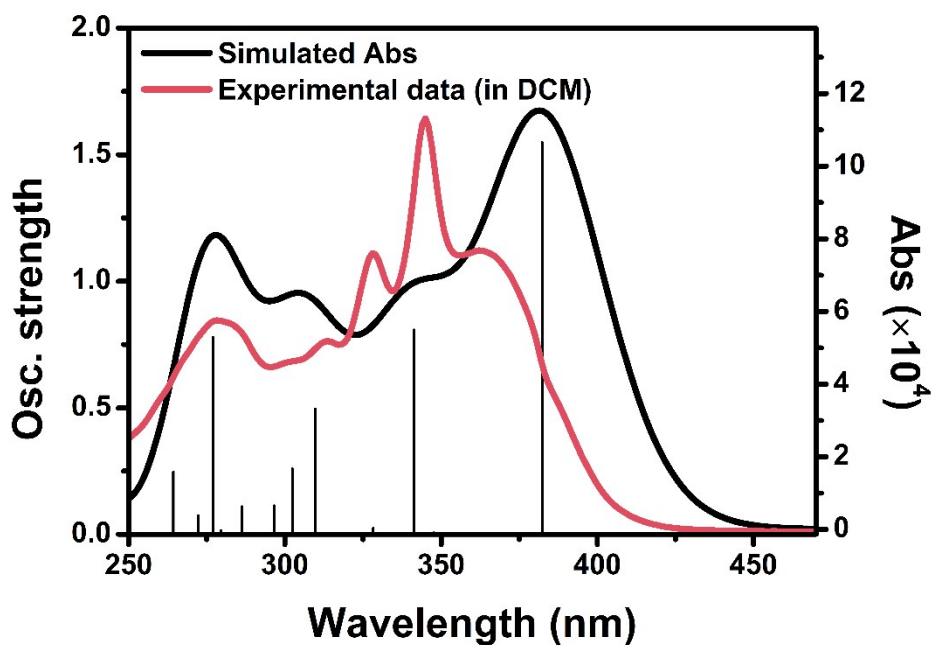

Figure S43. Electronic transition and simulated absorption spectra of **Me** in the ground state geometry obtained by TD-DFT calculations.

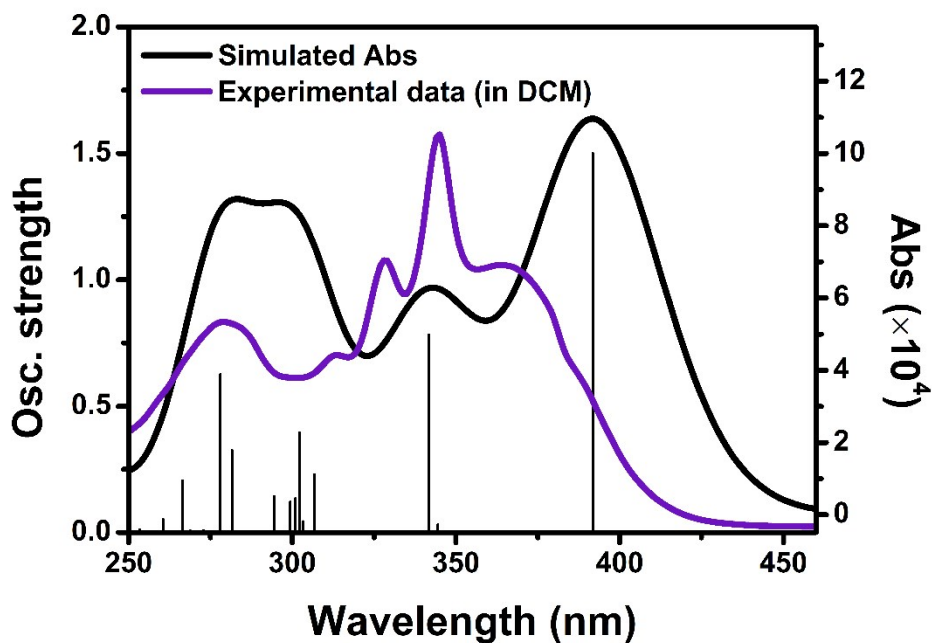

Figure S44. Electronic transition and simulated absorption spectra of **OMe** in the ground state geometry obtained by TD-DFT calculations.

Table S15. TD-DFT calculation: Transition assignment of CN

| No. | Excitation<br>Energy ( $cm^{-1}$ ) | Wavelength<br>(nm) | Oscillator<br>strength | Assignment                                       |
|-----|------------------------------------|--------------------|------------------------|--------------------------------------------------|
| 1   | 26214.00656                        | 381.48             | 0.0001                 | H-1->L+1 (35%), HOMO->LUMO (56%)                 |
| 2   | 27648.8768                         | 361.68             | 1.6166                 | HOMO->L+1 (91%)                                  |
| 3   | 28403.0104                         | 352.08             | 0.0214                 | H-2->LUMO (29%), H-2->L+3 (20%), HOMO->L+2 (50%) |
| 4   | 28436.88592                        | 351.66             | 0.7029                 | H-2->L+2 (28%), HOMO->L+3 (65%)                  |
| 5   | 28527.22064                        | 350.54             | 0.0082                 | H-2->LUMO (70%), H-2->L+3 (10%), HOMO->L+2 (19%) |
| 6   | 28931.3072                         | 345.65             | 0.1107                 | H-1->L+1 (46%), HOMO->LUMO (40%)                 |
| 7   | 29274.0952                         | 341.60             | 0.0004                 | H-2->L+1 (87%), HOMO->L+4 (10%)                  |
| 8   | 29282.96736                        | 341.50             | 0.7815                 | H-1->LUMO (82%)                                  |
| 9   | 30054.84528                        | 332.73             | 0                      | H-1->L+2 (100%)                                  |
| 10  | 30066.13712                        | 332.60             | 0.0057                 | H-1->L+3 (100%)                                  |
| 11  | 30817.85104                        | 324.49             | 0.0536                 | H-2->L+2 (53%), H-2->L+3 (16%), HOMO->L+3 (22%)  |
| 12  | 30819.46416                        | 324.47             | 0.0186                 | H-2->L+2 (16%), H-2->L+3 (53%), HOMO->L+2 (22%)  |
| 13  | 31502.62048                        | 317.43             | 0.0238                 | H-2->L+6 (38%), HOMO->L+5 (56%)                  |
| 14  | 31506.65328                        | 317.39             | 0.0061                 | H-2->L+5 (39%), HOMO->L+6 (56%)                  |
| 15  | 31927.6776                         | 313.21             | 0                      | H-2->L+1 (11%), HOMO->L+4 (85%)                  |
| 16  | 32070.43872                        | 311.81             | 0                      | H-1->L+4 (96%)                                   |
| 17  | 33108.48144                        | 302.04             | 0.0706                 | H-2->L+4 (80%)                                   |
| 18  | 33299.63616                        | 300.30             | 0.0561                 | H-3->LUMO (67%), H-1->L+1 (16%), H-1->L+7 (14%)  |
| 19  | 34490.11872                        | 289.94             | 0                      | H-1->L+5 (96%)                                   |
| 20  | 34519.15488                        | 289.69             | 0.0082                 | H-1->L+6 (95%)                                   |



Table S16. TD-DFT calculation: Transition assignment of **F**

| No. | Excitation<br>Energy ( $cm^{-1}$ ) | Wavelength<br>(nm) | Oscillator<br>strength | Assignment                                         |
|-----|------------------------------------|--------------------|------------------------|----------------------------------------------------|
| 1   | 24317.784                          | 411.22             | 0.004                  | HOMO->LUMO (92%)                                   |
| 2   | 25638.12272                        | 390.04             | 0                      | H-1->LUMO (99%)                                    |
| 3   | 26821.34624                        | 372.84             | 1.4732                 | HOMO->L+1 (95%)                                    |
| 4   | 28499.7976                         | 350.88             | 0                      | H-1->L+1 (97%)                                     |
| 5   | 28867.58896                        | 346.41             | 0.0111                 | H-3->LUMO (25%), H-2->L+1 (65%)                    |
| 6   | 29357.17088                        | 340.63             | 0.8783                 | H-2->LUMO (84%)                                    |
| 7   | 29568.4896                         | 338.20             | 0.0296                 | H-1->L+3 (38%), HOMO->L+2 (59%)                    |
| 8   | 29573.32896                        | 338.14             | 0.0008                 | H-1->L+2 (39%), HOMO->L+3 (59%)                    |
| 9   | 32589.0568                         | 306.85             | 0                      | HOMO->L+4 (91%)                                    |
| 10  | 32993.94992                        | 303.09             | 0.0001                 | H-1->L+6 (36%), HOMO->L+5 (60%)                    |
| 11  | 33002.01552                        | 303.01             | 0.3485                 | H-1->L+5 (35%), HOMO->L+6 (60%)                    |
| 12  | 33516.6008                         | 298.36             | 0.0079                 | H-1->L+4 (23%), H-1->L+8 (28%), HOMO->L+7<br>(42%) |
| 13  | 33612.58144                        | 297.51             | 0                      | H-1->L+7 (37%), HOMO->L+8 (57%)                    |
| 14  | 33665.00784                        | 297.04             | 0.0004                 | H-1->L+2 (58%), HOMO->L+3 (39%)                    |
| 15  | 33669.8472                         | 297.00             | 0.0006                 | H-1->L+3 (59%), HOMO->L+2 (39%)                    |
| 16  | 33756.95568                        | 296.24             | 0.3164                 | H-1->L+4 (58%), H-1->L+8 (10%), HOMO->L+7<br>(16%) |
| 17  | 33890.03808                        | 295.07             | 0.1043                 | H-3->LUMO (67%), H-2->L+1 (26%)                    |
| 18  | 34794.9984                         | 287.40             | 0                      | H-2->L+4 (73%), H-2->L+9 (14%)                     |
| 19  | 34861.13632                        | 286.85             | 0                      | H-1->L+11 (33%), HOMO->L+10 (57%)                  |
| 20  | 34900.65776                        | 286.53             | 0.0844                 | H-1->L+10 (35%), HOMO->L+11 (55%)                  |

Table S17. TD-DFT calculation: Transition assignment of **H**

| No. | Excitation<br>Energy ( $cm^{-1}$ ) | Wavelength<br>(nm) | Oscillator<br>strength | Assignment                                         |
|-----|------------------------------------|--------------------|------------------------|----------------------------------------------------|
| 1   | 24103.23904                        | 414.88             | 0.004                  | HOMO->LUMO (93%)                                   |
| 2   | 25341.30864                        | 394.61             | 0                      | H-1->LUMO (99%)                                    |
| 3   | 26635.83744                        | 375.43             | 1.4598                 | HOMO->L+1 (95%)                                    |
| 4   | 28251.37712                        | 353.97             | 0                      | H-1->L+1 (97%)                                     |
| 5   | 28834.52                           | 346.81             | 0.009                  | H-3->LUMO (27%), H-2->L+1 (65%)                    |
| 6   | 29340.23312                        | 340.83             | 0.8289                 | H-2->LUMO (84%)                                    |
| 7   | 31019.49104                        | 322.38             | 0.0249                 | H-1->L+4 (39%), HOMO->L+3 (58%)                    |
| 8   | 31025.13696                        | 322.32             | 0.0004                 | H-1->L+3 (39%), HOMO->L+4 (57%)                    |
| 9   | 32451.13504                        | 308.16             | 0                      | HOMO->L+2 (93%)                                    |
| 10  | 32613.2536                         | 306.62             | 0.0002                 | H-1->L+6 (37%), HOMO->L+5 (60%)                    |
| 11  | 32622.12576                        | 306.54             | 0.3896                 | H-1->L+5 (36%), HOMO->L+6 (60%)                    |
| 12  | 33498.85648                        | 298.52             | 0.2319                 | H-1->L+2 (80%)                                     |
| 13  | 33844.87072                        | 295.47             | 0.1172                 | H-3->LUMO (67%), H-2->L+1 (28%)                    |
| 14  | 34869.20192                        | 286.79             | 0                      | H-2->L+2 (69%), H-2->L+7 (16%)                     |
| 15  | 35236.99328                        | 283.79             | 0.0005                 | H-1->L+4 (51%), HOMO->L+3 (34%)                    |
| 16  | 35258.7704                         | 283.62             | 0.0044                 | H-1->L+3 (57%), HOMO->L+4 (40%)                    |
| 17  | 35439.43984                        | 282.17             | 0.0001                 | H-1->L+10 (32%), HOMO->L+8 (46%)                   |
| 18  | 35441.85952                        | 282.15             | 0.0473                 | H-1->L+8 (36%), HOMO->L+10 (53%)                   |
| 19  | 35620.10928                        | 280.74             | 0.1714                 | H-1->L+11 (37%), HOMO->L+9 (19%), HOMO->L+12 (34%) |
| 20  | 35654.79136                        | 280.47             | 0                      | H-1->L+9 (16%), H-1->L+12 (22%), HOMO->L+11 (54%)  |

Table S18. TD-DFT calculation: Transition assignment of **Me**

| No. | Excitation<br>Energy ( $cm^{-1}$ ) | Wavelength<br>(nm) | Oscillator<br>strength | Assignment                                         |
|-----|------------------------------------|--------------------|------------------------|----------------------------------------------------|
| 1   | 23518.48304                        | 425.20             | 0.004                  | HOMO->LUMO (95%)                                   |
| 2   | 24618.63088                        | 406.20             | 0                      | H-1->LUMO (99%)                                    |
| 3   | 26150.28832                        | 382.40             | 1.5484                 | HOMO->L+1 (95%)                                    |
| 4   | 27718.24096                        | 360.77             | 0                      | H-1->L+1 (97%)                                     |
| 5   | 28761.9296                         | 347.68             | 0.0062                 | H-3->LUMO (30%), H-2->L+1 (63%)                    |
| 6   | 29295.06576                        | 341.35             | 0.8078                 | H-2->LUMO (83%)                                    |
| 7   | 30454.89904                        | 328.35             | 0.0247                 | H-1->L+4 (39%), HOMO->L+3 (58%)                    |
| 8   | 30459.7384                         | 328.30             | 0.0022                 | H-1->L+3 (40%), HOMO->L+4 (57%)                    |
| 9   | 32076.08464                        | 311.76             | 0                      | HOMO->L+2 (93%)                                    |
| 10  | 32275.30496                        | 309.83             | 0.0004                 | H-1->L+6 (37%), HOMO->L+5 (60%)                    |
| 11  | 32286.5968                         | 309.73             | 0.4963                 | H-1->L+5 (37%), HOMO->L+6 (59%)                    |
| 12  | 33064.12064                        | 302.44             | 0.2595                 | H-1->L+2 (80%)                                     |
| 13  | 33706.94896                        | 296.67             | 0.1135                 | H-3->LUMO (65%), H-2->L+1 (31%)                    |
| 14  | 34617.5552                         | 288.87             | 0.0004                 | H-1->L+4 (56%), HOMO->L+3 (38%)                    |
| 15  | 34628.04048                        | 288.78             | 0.0031                 | H-1->L+3 (58%), HOMO->L+4 (41%)                    |
| 16  | 34911.14304                        | 286.44             | 0.0001                 | H-1->L+11 (34%), HOMO->L+8 (52%)                   |
| 17  | 34924.048                          | 286.34             | 0.1101                 | H-1->L+10 (38%), HOMO->L+9 (52%)                   |
| 18  | 34932.92016                        | 286.26             | 0.0682                 | H-1->L+8 (37%), HOMO->L+11 (54%)                   |
| 19  | 34945.01856                        | 286.16             | 0                      | H-1->L+9 (37%), HOMO->L+10 (55%)                   |
| 20  | 34982.12032                        | 285.86             | 0                      | H-4->LUMO (10%), H-2->L+2 (60%), H-2->L+7<br>(19%) |

Table S19. TD-DFT calculation: Transition assignment of **OMe**

| No. | Excitation<br>Energy ( $cm^{-1}$ ) | Wavelength<br>(nm) | Oscillator<br>strength | Assignment                        |
|-----|------------------------------------|--------------------|------------------------|-----------------------------------|
| 1   | 22600.61776                        | 442.47             | 0.0039                 | HOMO->LUMO (97%)                  |
| 2   | 23553.16512                        | 424.57             | 0                      | H-1->LUMO (99%)                   |
| 3   | 25522.78464                        | 391.81             | 1.5004                 | HOMO->L+1 (96%)                   |
| 4   | 27010.08128                        | 370.23             | 0                      | H-1->L+1 (98%)                    |
| 5   | 28664.33584                        | 348.87             | 0.0038                 | H-3->LUMO (36%), H-2->L+1 (58%)   |
| 6   | 29035.35344                        | 344.41             | 0.0312                 | H-1->L+3 (39%), HOMO->L+2 (58%)   |
| 7   | 29040.1928                         | 344.35             | 0.0155                 | H-1->L+2 (40%), HOMO->L+3 (57%)   |
| 8   | 29258.77056                        | 341.78             | 0.783                  | H-2->LUMO (82%)                   |
| 9   | 31716.35888                        | 315.29             | 0                      | HOMO->L+4 (93%)                   |
| 10  | 32595.50928                        | 306.79             | 0.2292                 | H-1->L+4 (74%)                    |
| 11  | 32979.43184                        | 303.22             | 0.0439                 | H-1->L+2 (47%), HOMO->L+3 (33%)   |
| 12  | 32982.65808                        | 303.19             | 0.0057                 | H-1->L+3 (46%), HOMO->L+2 (32%)   |
| 13  | 33082.67152                        | 302.27             | 0.002                  | H-1->L+6 (31%), HOMO->L+5 (48%)   |
| 14  | 33088.31744                        | 302.22             | 0.3943                 | H-1->L+5 (30%), HOMO->L+6 (49%)   |
| 15  | 33225.43264                        | 300.97             | 0.0026                 | H-1->L+8 (39%), HOMO->L+9 (51%)   |
| 16  | 33230.272                          | 300.93             | 0.1351                 | H-1->L+9 (37%), HOMO->L+8 (48%)   |
| 17  | 33407.7152                         | 299.33             | 0.1211                 | H-3->LUMO (57%), H-2->L+1 (34%)   |
| 18  | 33903.7496                         | 294.95             | 0.0001                 | H-1->L+11 (34%), HOMO->L+10 (54%) |
| 19  | 33956.176                          | 294.50             | 0.1427                 | H-1->L+10 (34%), HOMO->L+11 (50%) |
| 20  | 34588.51904                        | 289.11             | 0                      | HOMO->L+7 (95%)                   |

## References

1. G. Sheldrick, *SMART and SAINT*, Bruker Analytical X-ray Division, Madison, WI, **2001**.
2. G. Sheldrick, *SHELXTL-PLUS Software Package*, Bruker Analytical X-Ray Division, Madison, WI, **2002**.
3. J. V. Morris, M. A. Mahaney and J. R. Huber, *J. Phys. Chem. A*, 1976, **80**, 969-974.
4. M. Frisch, G. Trucks, H. Schlegel, G. Scuseria, M. Robb, J. Cheeseman, G. Scalmani, V. Barone, G. Petersson and H. Nakatsuji, *Gaussian Inc. Wallingford CT*, 2016, **1**.
5. C. Lee, W. Yang and R. G. Parr, *Phys. Rev. B*, 1988, **37**, 785.
6. S. H. Vosko, L. Wilk and M. Nusair, *Can. J. Phys.*, 1980, **58**, 1200-1211.
7. A. D. Becke, *J. Chem. Phys.*, 1993, **98**, 1372-1377.
8. P. J. Stephens, F. J. Devlin, C. F. Chabalowski and M. J. Frisch, *J. Phys. Chem.*, 1994, **98**, 11623-11627.
9. S. Huzinaga, J. Andzelm, E. Radzio-Andzelm, Y. Sakai, H. Tatewaki and M. Klobukowski, *Gaussian basis sets for molecular calculations*, Elsevier, 2012.
10. E. R. Davidson and D. Feller, *Chem. Rev.*, 1986, **86**, 681-696.
